# Supplementary material for: Intramolecular proton transfer impact on antibacterial properties of ansamycin antibiotic rifampicin and its new amino analogues
Source: Royal Society of Chemistry journal article supplement (doi:10.1039/c2ob00008c), 2012-01-01

## Electronic Supplementary Information (ESI)

# Intramolecular proton transfer impact on antibacterial properties of ansamycin antibiotic rifampicin and its new amino analogues

Krystian Pyta<sup>a</sup>, Piotr Przybylski<sup>a\*</sup>, Barbara Wicher<sup>a</sup>, Maria Gdaniec<sup>a</sup> and Joanna Stefańska<sup>b</sup>

<sup>a</sup>*Faculty of Chemistry, A. Mickiewicz University, Grunwaldzka 6, 60-780  
Poznan, Poland*

<sup>b</sup>*Medical University of Warsaw, Department of Pharmaceutical Microbiology, Oczki 3,  
02-007 Warsaw, Poland*

*E-mail: piotrp@amu.edu.pl; Fax: +48 618291505; Tel: +48 61 8291252*

### Contents:

1. Experimental details
  2. General procedure of synthesis of new rifampicin analogs.
- Table 1S.** Selected hydrogen-bond parameters.
- Table 2S.** Crystal data and details of structure refinement.
- Table 3S.** Total assignment of <sup>1</sup>H NMR  $\delta$  [ppm] chemical shifts and coupling constants  $J$ [Hz] for **1-9** and **Ral** (rifaldehyde) in CDCl<sub>3</sub>.
- Table 4S.** Total assignment of <sup>13</sup>C NMR  $\delta$  [ppm] chemical shifts for **1-9** and **Ral** (rifaldehyde) in CDCl<sub>3</sub>.
- Table 5S.** Antibacterial activity MIC ( $\mu$ g/mL) of **1-9** against Gram-(+) strains including methicillin-resistant /MRSA/ and methicillin-susceptible /MSSA/ ones.
- Figure 1S.** <sup>1</sup>H-<sup>15</sup>N HMBC spectrum of **1** in DMSO-d<sub>6</sub> after addition of water drop.
- Figure 2S.** <sup>1</sup>H-<sup>15</sup>N HSQC spectrum of **1** in DMSO-d<sub>6</sub> after addition of water drop.
- Figure 3S.** <sup>1</sup>H-<sup>15</sup>N HMBC spectrum of **2** in DMSO-d<sub>6</sub> after addition of water drop.
- Figure 4S.** <sup>1</sup>H-<sup>15</sup>N HSQC spectrum of **2** in DMSO-d<sub>6</sub> after addition of water drop.
- Figure 5S.** <sup>1</sup>H-<sup>13</sup>C HMBC spectrum of **1** in DMSO-d<sub>6</sub> after addition of water drop.
- Figure 6S.** <sup>1</sup>H-<sup>13</sup>C HMBC spectrum of **1** in DMSO-d<sub>6</sub> after addition of water drop in the range <sup>1</sup>H(1.4-2.2)-<sup>13</sup>C (164-188) ppm.
- Figure 7S.** <sup>1</sup>H-<sup>13</sup>C HMBC spectrum of **1** in CDCl<sub>3</sub>.

**Figure 8S.**  $^1\text{H}$ - $^{13}\text{C}$  HMBC spectrum of **1** in  $\text{CDCl}_3$  in the range  $^1\text{H}(11.5\text{-}14.5)$ - $^{13}\text{C}$  (103-195) ppm.

**Figure 9S.**  $^1\text{H}$ - $^{13}\text{C}$  HMBC spectrum of **1** in  $\text{CDCl}_3$  in the range  $^1\text{H}(1.5\text{-}2.4)$ - $^{13}\text{C}$  (166-198) ppm.

**Figure 10S.**  $^1\text{H}$ - $^{13}\text{C}$  HMBC spectrum of **5** in  $\text{CDCl}_3$ .

**Figure 11S.**  $^1\text{H}$ - $^{13}\text{C}$  HMBC spectrum of **5** in  $\text{CDCl}_3$  in the range  $^1\text{H}(1.75\text{-}2.2)$ - $^{13}\text{C}$  (168-190) ppm.

## 1. Experimental

### X-ray measurements

All crystals of the studied compounds were solvated and unstable in the air. Therefore diffraction data were collected at 130 K and crystals were mounted on a loop with small amount of perfluoropolyether. The diffraction measurements for **1-CH<sub>3</sub>CCl<sub>3</sub>** and **1-CH<sub>3</sub>OH-H<sub>2</sub>O** were carried out with a KumaCCD diffractometer using Mo-K $\alpha$  radiation ( $\lambda=0.71073$  Å). Data collection and reduction were performed with CrysAlis CCD<sup>1S</sup> and CrysAlis RED<sup>1S</sup>, respectively. For **2-CH<sub>3</sub>OH-CH<sub>2</sub>Cl<sub>2</sub>** the measurements were performed with a SuperNova diffractometer using hi-flux micro-focus Nova Cu-K $\alpha$  radiation ( $\lambda=1.54184$  Å). Data collection and reduction were performed with the CrysAlis Pro software.<sup>2S</sup> The structures were solved by directed method using the SHELXS-97 program for **1-CH<sub>3</sub>CCl<sub>3</sub>** and **1-CH<sub>3</sub>OH-H<sub>2</sub>O**<sup>3S</sup> and the Sir2004 program for **2-CH<sub>3</sub>OH-CH<sub>2</sub>Cl<sub>2</sub>**.<sup>4S</sup> The structures were refined by full-matrix least-squares method on F<sup>2</sup> with SHELXL-97.<sup>3S</sup> All non-hydrogen atoms were refined with anisotropic displacement parameters. The hydrogen atom positions of O-H and N-H groups were located in difference Fourier maps. For further refinement positions of all hydrogen atoms were determined geometrically (N-H 0.90 Å, O-H 0.84 Å, C-H<sub>3</sub> 0.98 Å, C-H<sub>2</sub> 0.99 Å, C-H 1.00 Å, HC=CH 0.95 Å) and were refined in the riding-model approximation, with  $U_{\text{iso}}(\text{H}) = 1.2 U_{\text{eq}}(\text{N,C})$  and  $U_{\text{iso}}(\text{H}) = 1.5 U_{\text{eq}}(\text{O,C}_{\text{methyl}})$ . In **2-CH<sub>3</sub>OH-CH<sub>2</sub>Cl<sub>2</sub>** two carbon atoms (C28, C29) from rifampicin *ansa* chain and two methanol molecules are disordered over two position. The dichloromethane molecule is disordered at least over three positions. The crystal data and some details of data collection and structure refinement are given in **Table 2S**. The intra- and intermolecular hydrogen-bond parameters are given in **Tables 1S**.

- 1S. Oxford Diffraction, CrysAlis CCD and CrysAlis RED Ver. 1.171.31. Oxford Diffraction Ltd., Abingdon, Oxfordshire, England, 2006.
- 2S. Agilent Technologies, *CrysAlis<sup>Pro</sup>*, Agilent Technologies, Yarnton, Oxfordshire, England, 2010.
- 3S. G.M. Sheldrick, *Acta Cryst.*, 2008, **A64**, 112-122.
- 4S. M. C. Burla, R. Caliandro, M. Camalli, B. Carrozzini, G. L. Cascarano, L. De Caro, C. Giacovazzo, G. Polidori and R. Spagna, *J. Appl. Cryst.*, 2005, **38**, 381-388.

## 1D and 2D NMR measurements

The NMR spectra of rifaldehyde and **1-9** (0.01-0.1 mol L<sup>-1</sup>) were recorded in following anhydrous solvents: CDCl<sub>3</sub>, CD<sub>3</sub>CN, CD<sub>3</sub>OD, DMSO-d<sub>6</sub> and py-d<sub>5</sub> and after addition of water drop using a Bruker Avance 600 M spectrometer at T = 253.0 K and T = 293.0 K. All spectra were locked to deuterium resonance of TMS.

The <sup>1</sup>H NMR measurements were carried out at the operating frequency of 600.001 M; flip angle, pw = 30<sup>0</sup>; spectral width, swh = 6459.95 ; acquisition time, aq = 5.07 s; relaxation delay, d<sub>1</sub>=1.0 s; using TMS as the internal standard. No window function or zero filling was used. Digital resolution was 0.2 per point. <sup>13</sup>C NMR spectra were recorded at the operating frequency 151.000 M; pw = 90<sup>0</sup>; swh = 3594 ; aq = 0.9 s; d<sub>1</sub>=2.0 s with TMS as the internal standard. Line broadening parameter was 1 .

The <sup>1</sup>H, <sup>13</sup>C and <sup>15</sup>N NMR signals were assigned independently for each compound using two-dimensional <sup>1</sup>H-<sup>1</sup>H COSY, <sup>1</sup>H-<sup>13</sup>C HSQC, <sup>1</sup>H-<sup>15</sup>N HSQC, <sup>1</sup>H-<sup>13</sup>C HMBC, <sup>1</sup>H-<sup>15</sup>N HMBC as well as <sup>1</sup>H-<sup>1</sup>H NOESY spectra. Two-dimensional <sup>1</sup>H-<sup>1</sup>H COSY and <sup>1</sup>H-<sup>1</sup>H NOESY spectra were acquired in the magnitude mode with the gradient selection method and with spectral widths of 6562 for both dimensions. The <sup>1</sup>H-<sup>1</sup>H COSY data were collected with 2048 points in t<sub>2</sub> and with 600 increments (4 scans per increment) in t<sub>1</sub> dimension. A relaxation delay of 1.0 s was applied between scans. The <sup>1</sup>H-<sup>1</sup>H NOESY data were collected with 1024 points in t<sub>2</sub> and with 1024 increments (16 scans per increment) in t<sub>1</sub> dimension. A relaxation delay of 3.0 s was applied between scans. The data from <sup>1</sup>H-<sup>13</sup>C HSQC and <sup>1</sup>H-<sup>13</sup>C HMBC experiments were collected in the absolute-value mode using the gradient selection method and with spectral ranges of 6561 (<sup>1</sup>H axis) and 33 557 (<sup>13</sup>C axis). The <sup>1</sup>H-<sup>13</sup>C HSQC data were collected with 1024 points in t<sub>2</sub> and with 1024 t<sub>1</sub> increments (4 scans per increment). A relaxation delay of 1.0 s was applied between scans. Before Fourier transformation, Gaussian window functions were applied to the data in both dimensions. The <sup>1</sup>H-<sup>13</sup>C HMBC data were collected with 2048 data points in t<sub>2</sub> and 1024 t<sub>1</sub> increments (16 scans per increment) and with a delay of 1.0 s between scans. Prior to Fourier transformation, mixed-mode processing was used by applying to the data a sine-bell window function in t<sub>2</sub> dimension and a shifted Gaussian window function in t<sub>1</sub> dimension.

The data from <sup>1</sup>H-<sup>15</sup>N HSQC and <sup>1</sup>H-<sup>15</sup>N HMBC experiments were collected in the absolute-value mode using the gradient selection method and with spectral ranges of 9995 (<sup>1</sup>H axis) and 48 732 (<sup>15</sup>N axis). <sup>1</sup>H-<sup>15</sup>N HMBC data were collected with 1024 points in t<sub>2</sub> and with 2048 t<sub>1</sub> increments (16 scans per increment). <sup>1</sup>H-<sup>15</sup>N HSQC data were collected with 1024 points in t<sub>2</sub> and with 1024 t<sub>1</sub> increments (4 scans per increment). Acquisition time were

0.2048 s and 0.0026 s, respectively. A relaxation delay of 1.0 s was applied between scans. The detailed  $^1\text{H}$  and  $^{13}\text{C}$  NMR data were collected in **Tables 3S and 4S**. Exemplary  $^1\text{H}$ - $^{15}\text{N}$  HSQC of **1** and **2** as well as  $^1\text{H}$ - $^{13}\text{C}$  HSQC and HMBC of **5** and **8** spectra were shown in **Figures 1S-11S**.

### **MALDI-TOF measurements**

The MALDI-TOF spectra of rifaldehyde and **1-9** were obtained on Water/Micromass (Manchester, UK) Q-TOF Premier mass spectrometer (software MassLynx V4.1, Manchester, UK) fitted with a 200 repetition rate Nd/YAG ( $\lambda = 355$  nm, power density  $107$  W/cm<sup>2</sup>). The compounds analyzed were solids and the matrix used was DHB.

### **PM5 modelling of interactions between 1 - zwitterionic form (phenolate form) and aminoacid residues of the binding site in the RNA polymerase (RNAP)**

X-ray structure of **1**-CH<sub>3</sub>OH-H<sub>2</sub>O as phenolate form (gray color- **Figure 3a**) was docked on the naphthalene ring carbon atom coordinates of rifampicin (yellow color – **Figure 3a**) from the X-ray structure of Rifampicin-RNA polymerase complex according to Campbell et al.<sup>3</sup> The structure of RNAP enzyme was locked in earlier determined coordinates relative to rifampicin with exception of oxygen atoms of carboxylate group of E<sub>445</sub>. The interactions between **1** molecule, docked as phenolate form, and the aminoacid residues at the binding site to RNAP were modelled *via* geometry calculation in MOPAC using PM5 parameters (Cache Work System Pro Version 7.5.085 – Fujitsu), with the energy gradient not exceeding 2 kcal mol<sup>-1</sup> at one step (3678 steps). MOZYME algorithm suitable for large molecules was applied<sup>5S</sup>. To get insight into interactions between **2** and RNAP binding site, the crystal structure of **2**-CH<sub>3</sub>OH-CH<sub>2</sub>Cl<sub>2</sub> as zwitterion with the transferred proton from O<sub>8</sub>-H to N(40) atom (grey color - **Figure 3b**) was docked at the coordinates of carbon atoms of naphthalene ring of rifampicin molecule according to Campbell et al.<sup>3</sup>

5S. Cache Work System Pro Version 7.5.085 UserGuide, Fujitsu, Beaverton, Oregon, USA, 2007.

## Antibacterial activity tests of 1-9 and ciprofloxacin (CIP)

The research of antibacterial activity performed for a series of Gram-positive, including reference and hospital strains. Microorganisms used in this study were as follows: standard strains of Gram-positive cocci: *Staphylococcus aureus* NCTC 4163, *Staphylococcus aureus* ATCC 25923, *Staphylococcus aureus* ATCC 6538, *Staphylococcus aureus* ATCC 29213, *Staphylococcus epidermidis* ATCC 12228 and 20 hospital isolates of *Staphylococcus aureus* (10 methicillin-susceptible /MSSA/ and 10 methicillin-resistant/MRSA/). Clinical strains of tested bacteria were isolated from different biological materials of patients of the Warsaw Medical University Hospital. Other microorganisms used were obtained from the collection of the Department of Pharmaceutical Microbiology, Medical University of Warsaw, Poland. Minimal Inhibitory Concentration (MIC) was examined by the twofold serial dilution method using Mueller-Hinton II agar medium (Beckton Dickinson) according to CLSI guidelines.<sup>6S</sup> Concentrated solutions of **1-9** and **CIP** tested compounds were prepared in methanol, then diluted in water were performed to obtain the required concentration. Concentrations of tested agents in solid medium ranged from 8 to 0.002  $\mu\text{g mL}^{-1}$  (Gram-positive bacteria). The final inoculum of all studied organisms were 104 CFU  $\text{mL}^{-1}$  (colony forming units per ml). Minimal inhibitory concentrations were read after 18h of incubation at 35 °C. The complete data of antibacterial tests were collected in **Table 5S**.

6S. Clinical and Laboratory Standards Institute Methods for Dilution Antimicrobial Susceptibility Tests for Bacteria That Grow Aerobically; Approved Standard M7-A-7, Clinical and Laboratory Standards Institute, Wayne, Pa. USA, 2006.

## 2. General procedure of synthesis of rifaldehyde and new rifampicin analogs.

### Synthesis of rifaldehyde (Ral)

To rifampicin (212.1 mg, 0.25 mmol) dissolved in diethyl ether (200 ml) 50 ml of 0.2 M HCl/H<sub>2</sub>O was added and stirred for four days at room temperature. Next the organic layer was separated, twice washed with 100 ml of water and evaporated. To crude rifaldehyde 50 ml CH<sub>2</sub>Cl<sub>2</sub> was added and extracted with 25 ml of brine and separated. Organic layer was evaporated to dryness yielding rifaldehyde as red powder (167.5 mg; Yield: 89%). The rifaldehyde was characterised by: Elemental analysis C<sub>38</sub>H<sub>47</sub>NO<sub>13</sub>: calculated C=62.89%,

H=6.53%, N=1.93%; found C=62.83%, H=6.50%, N=1.87%; m.p.=180-185°C; HR-MALDI-TOF  $[M+H]^+$  726.3116; FT-IR (KBr, 1.5 mg): 3415  $\text{cm}^{-1}$   $\nu(\text{O}_{21}\text{-H})+\nu(\text{O}_{23}\text{-H})$ , 3200  $\text{cm}^{-1}$   $\nu(\text{O}_8\text{-H}\cdots\text{O}_1)+\nu(\text{O}_4\text{-H}\cdots\text{O}_{11})+\nu(\text{O}_1\text{-H}\cdots\text{O}_{15})$ , 2550  $\text{cm}^{-1}$   $\nu(\text{N}_{\text{amide}}\text{-H})$ , 1726  $\text{cm}^{-1}$   $\nu(\text{C}_{35}=\text{O})$ , 1654  $\text{cm}^{-1}$   $\nu(\text{C}_{38}=\text{O})_{\text{aldehyde}}+\nu(\text{C}_{11}=\text{O})_{\text{ketone}}$ , 1642  $\text{cm}^{-1}$   $\nu(\text{C}_{15}=\text{O})_{\text{amide I}}$ , 1575  $\text{cm}^{-1}$   $\nu(\text{C}=\text{C})_{\text{naphthalene}}$ , 1538  $\text{cm}^{-1}$   $\nu(\text{C-N})_{\text{amide II}}$ , 1464  $\text{cm}^{-1}$   $\nu(\text{C}=\text{C})$ , 1249  $\text{cm}^{-1}$   $\nu(\text{C-O})$ ;  $^1\text{H}$  and  $^{13}\text{C}$  NMR (**Table 3S** and **4S**).

### Syntheses of 2-8

Rifaldehyde (181.4 mg, 0.25 mmol) was dissolved in 25 ml  $\text{CH}_2\text{Cl}_2$  and the respective amine (0.25 mmol) in 5 ml of  $\text{C}_2\text{H}_5\text{OH}$  with 0.025 mmol HCl was added. Mixture was stirred at 45°C for half an hour and after that a half of solvent volume was distilled off. To cooled reaction mixture (room temperature) reductant  $\text{NaBH}_3\text{CN}$  (15.7 mg, 0.025 mmol) was added portionwise during 10 min. The reaction mixture was evaporated to dryness, dissolved in 30 ml of ethyl acetate and extracted twice with 30 ml of water and brine. The separated organic layer was evaporated and the respective synthesised analogs of rifampicin (compounds **2-8**) were purified by column chromatography with silica gel (25 cm  $\times$  1 cm, silica gel 60, 0.040-0.063 mm/230-400 mesh ASTM, Fluka) and ethyl acetate/methanol as eluent (from 100:0 to 15:1). TLC (10:1 ethyl acetate:methanol as eluent) was developed. Compounds **2-8** were obtained as orange-red solids.

**2:** Yield: 70%; Elemental analysis  $\text{C}_{41}\text{H}_{54}\text{N}_2\text{O}_{12}$ : calculated C=64.21%, H=7.10%, N=3.65%; found C=64.17%, H=7.11%, N=3.62%; m.p.=178-183°C; HR-MALDI-TOF  $[M+H]^+$  767.3741; FT-IR ( $\text{CHCl}_3$ ,  $c=0.05\text{M}$ ): 3471  $\text{cm}^{-1}$   $\nu(\text{O}_{21}\text{-H})+\nu(\text{O}_{23}\text{-H})$ , 3384  $\text{cm}^{-1}$   $\nu(\text{N}_{\text{amide}}\text{-H})$ , 3200  $\text{cm}^{-1}$   $\nu(\text{O}_4\text{-H}\cdots\text{O}_{11})$ , 2750  $\text{cm}^{-1}$   $\nu(\text{N}_{38}^+\text{-H}\cdots\text{O}_{15})$ , 2500  $\text{cm}^{-1}$   $\nu(\text{O}_1\text{-H}\cdots\text{O}_8^-)$ , 1716  $\text{cm}^{-1}$   $\nu(\text{C}_{35}=\text{O})$ , 1647  $\text{cm}^{-1}$   $\nu(\text{C}_{15}=\text{O})_{\text{amide I}} + \nu(\text{C}=\text{C})_{\text{allyl}}$ , 1600  $\text{cm}^{-1}$   $\nu(\text{C}=\text{C})_{\text{naphthalene}}$ , 1538  $\text{cm}^{-1}$   $\nu(\text{C-N})_{\text{amide II}}$ , 1500 and 1480  $\text{cm}^{-1}$   $\nu(\text{C}=\text{C})$ , 1250 and 1260  $\text{cm}^{-1}$   $\nu(\text{C-O})$ ;  $^1\text{H}$  and  $^{13}\text{C}$  NMR (**Table 3S** and **4S**).

**3:** Yield: 46%; Elemental analysis  $\text{C}_{40}\text{H}_{54}\text{N}_2\text{O}_{13}$ : calculated C=62.32%, H=7.06%, N=3.63%; found C=62.27%, H=7.00%, N=3.59%; m.p.=195-198°C; HR-MALDI-TOF  $[M+H]^+$  771.3699; FT-IR (KBr, 1.5 mg): 3429 and 3402  $\text{cm}^{-1}$   $\nu(\text{O}_{21}\text{-H})+\nu(\text{O}_{23}\text{-H})+\nu(\text{O}_{40}\text{-H})$ , 3350  $\text{cm}^{-1}$   $\nu(\text{N}_{\text{amide}}\text{-H})$ , 3141  $\text{cm}^{-1}$   $\nu(\text{O}_4\text{-H}\cdots\text{O}_{11})$ , 2746  $\text{cm}^{-1}$   $\nu(\text{N}_{38}^+\text{-H}\cdots\text{O}_{15})$ , 2460  $\text{cm}^{-1}$   $\nu(\text{O}_1\text{-H}\cdots\text{O}_8^-)$ , 1721  $\text{cm}^{-1}$   $\nu(\text{C}_{35}=\text{O})$ , 1648  $\text{cm}^{-1}$   $\nu(\text{C}_{15}=\text{O})_{\text{amide I}}$ , 1599  $\text{cm}^{-1}$   $\nu(\text{C}=\text{C})_{\text{naphthalene}}$ , 1562  $\text{cm}^{-1}$   $\nu(\text{C}=\text{C})$ , 1539  $\text{cm}^{-1}$   $\nu(\text{C-N})_{\text{amide II}}$ , 1453 and 1445  $\text{cm}^{-1}$   $\nu(\text{C}=\text{C})$ , 1249 and 1238  $\text{cm}^{-1}$   $\nu(\text{C-O})$ ;  $^1\text{H}$  and  $^{13}\text{C}$  NMR (**Table 3S** and **4S**).

**4:** Yield: 56%; Elemental analysis  $C_{42}H_{58}N_2O_{13}$ : calculated C=63.14%, H=7.32%, N=3.51%; found C=63.07%, H=7.29%, N=3.48%; m.p.=168-176°C; HR-MALDI-TOF  $[M+H]^+$  799.4006; FT-IR (KBr, 1.5 mg): 3430 and 3400  $cm^{-1}$   $\nu(O_{21}-H)+\nu(O_{23}-H)+\nu(O_{42}-H)$ , 3348  $cm^{-1}$   $\nu(N_{amide}-H)$ , 3140  $cm^{-1}$   $\nu(O_4-H\cdots O_{11})$ , 2744  $cm^{-1}$   $\nu(N_{38}^+-H\cdots O_{15})$ , 2462  $cm^{-1}$   $\nu(O_1-H\cdots O_8^-)$ , 1720  $cm^{-1}$   $\nu(C_{35}=O)$ , 1645  $cm^{-1}$   $\nu(C_{15}=O)_{amide\ I}$ , 1596  $cm^{-1}$   $\nu(C=C)_{naphthalene}$ , 1561  $cm^{-1}$   $\nu(C=C)$ , 1538  $cm^{-1}$   $\nu(C-N)_{amide\ II}$ , 1452 and 1444  $cm^{-1}$   $\nu(C=C)$ , 1247 and 1236  $cm^{-1}$   $\nu(C-O)$ ;  $^1H$  and  $^{13}C$  NMR (**Table 3S** and **4S**).

**5:** Yield: 60%; Elemental analysis  $C_{44}H_{62}N_2O_{13}$ : calculated C=63.90%, H=7.56%, N=3.39%; found C=63.89%, H=7.54%, N=3.36%; m.p.=152-158°C; HR-MALDI-TOF  $[M+H]^+$  827.4321; FT-IR (KBr, 1.5 mg): 3434 and 3402  $cm^{-1}$   $\nu(O_{21}-H)+\nu(O_{23}-H)+\nu(O_{44}-H)$ , 3350  $cm^{-1}$   $\nu(N_{amide}-H)$ , 3144  $cm^{-1}$   $\nu(O_4-H\cdots O_{11})$ , 2740  $cm^{-1}$   $\nu(N_{38}^+-H\cdots O_{15})$ , 2460  $cm^{-1}$   $\nu(O_1-H\cdots O_8^-)$ , 1719  $cm^{-1}$   $\nu(C_{35}=O)$ , 1649  $cm^{-1}$   $\nu(C_{15}=O)_{amide\ I}$ , 1598  $cm^{-1}$   $\nu(C=C)_{naphthalene}$ , 1560  $cm^{-1}$   $\nu(C=C)$ , 1536  $cm^{-1}$   $\nu(C-N)_{amide\ II}$ , 1450 and 1441  $cm^{-1}$   $\nu(C=C)$ , 1245 and 1235  $cm^{-1}$   $\nu(C-O)$ ;  $^1H$  and  $^{13}C$  NMR (**Table 3S** and **4S**).

**6:** Yield: 62%; Elemental analysis  $C_{46}H_{66}N_2O_{14}$ : calculated C=63.43%, H=7.64%, N=3.22%; found C=63.40%, H=7.61%, N=3.18%; m.p.=190-193°C; HR-MALDI-TOF  $[M+H]^+$  871.4581; FT-IR (KBr, 1.5 mg): 3427 and 3390  $cm^{-1}$   $\nu(O_{21}-H)+\nu(O_{23}-H)$ , 3342  $cm^{-1}$   $\nu(N_{amide}-H)$ , 3100  $cm^{-1}$   $\nu(O_4-H\cdots O_{11})$ , 2745  $cm^{-1}$   $\nu(N_{38}^+-H\cdots O_{15})$ , 2444  $cm^{-1}$   $\nu(O_1-H\cdots O_8^-)$ , 1716  $cm^{-1}$   $\nu(C_{35}=O)$ , 1650  $cm^{-1}$   $\nu(C_{15}=O)_{amide\ I}$ , 1599  $cm^{-1}$   $\nu(C=C)_{naphthalene}$ , 1574  $cm^{-1}$   $\nu(C=C)$ , 1539  $cm^{-1}$   $\nu(C-N)_{amide\ II}$ , 1458 and 1441  $cm^{-1}$   $\nu(C=C)$ , 1246  $cm^{-1}$   $\nu(C-O)$ , 1100 and 1082  $cm^{-1}$   $\nu(C-O)_{oxaalkyl\ chain}$ ;  $^1H$  and  $^{13}C$  NMR (**Table 3S** and **4S**).

**7:** Yield: 59%; Elemental analysis  $C_{44}H_{58}N_4O_{12}$ : calculated C=63.29%, H=7.00%, N=6.71%; found C=63.27%, H=6.96%, N=6.65%; m.p.=183-186°C; HR-MALDI-TOF  $[M+H]^+$  835.4120; FT-IR (KBr, 1.5 mg): 3428 and 3394  $cm^{-1}$   $\nu(O_{21}-H)+\nu(O_{23}-H)$ , 3345  $cm^{-1}$   $\nu(N_{amide}-H)$ , 3105  $cm^{-1}$   $\nu(O_4-H\cdots O_{11})$ , 2740  $cm^{-1}$   $\nu(N_{38}^+-H\cdots O_{15})$ , 2440  $cm^{-1}$   $\nu(O_1-H\cdots O_8^-)$ , 1718  $cm^{-1}$   $\nu(C_{35}=O)$ , 1652  $cm^{-1}$   $\nu(C_{15}=O)_{amide\ I}$ , 1619  $cm^{-1}$   $\nu(C=N)_{imidazole\ ring}$ , 1598  $cm^{-1}$   $\nu(C=C)_{naphthalene}$ , 1570  $cm^{-1}$   $\nu(C=C)$ , 1538  $cm^{-1}$   $\nu(C-N)_{amide\ II}$ , 1460 and 1443  $cm^{-1}$   $\nu(C=C)$ , 1250  $cm^{-1}$   $\nu(C-O)$ , 662  $cm^{-1}$   $\gamma(C-H)_{imidazole\ ring}$ ;  $^1H$  and  $^{13}C$  NMR (**Table 3S** and **4S**).

**8:** Yield: 68%; Elemental analysis  $C_{44}H_{56}N_2O_{12}S$ : calculated C=63.14%, H=6.74%, N=3.35%; found C=63.10%, H=6.71%, N=3.33%; m.p.=187-192°C; HR-MALDI-TOF  $[M+H]^+$  837.3627; FT-IR (KBr, 1.5 mg): 3430 and 3390  $cm^{-1}$   $\nu(O_{21}-H)+\nu(O_{23}-H)$ , 3349  $cm^{-1}$



$\nu(\text{N}_{\text{amide-H}})$ ,  $3109\text{ cm}^{-1}$   $\nu(\text{O}_4\text{-H}\cdots\text{O}_{11})$ ,  $2736\text{ cm}^{-1}$   $\nu(\text{N}_{38}^+\text{-H}\cdots\text{O}_{15})$ ,  $2445\text{ cm}^{-1}$   $\nu(\text{O}_1\text{-H}\cdots\text{O}_8^-)$ ,  $1717\text{ cm}^{-1}$   $\nu(\text{C}_{35}=\text{O})$ ,  $1650\text{ cm}^{-1}$   $\nu(\text{C}_{15}=\text{O})_{\text{amide I}}$ ,  $1595\text{ cm}^{-1}$   $\nu(\text{C}=\text{C})_{\text{naphthalene}}$ ,  $1566\text{ cm}^{-1}$   $\nu(\text{C}=\text{C})$ ,  $1538\text{ cm}^{-1}$   $\nu(\text{C-N})_{\text{amide II}}$ ,  $1461$  and  $1441\text{ cm}^{-1}$   $\nu(\text{C}=\text{C})$ ,  $1249$  and  $1237\text{ cm}^{-1}$   $\nu(\text{C-O})$ ,  $699\text{ cm}^{-1}$   $\gamma(\text{C-H})_{\text{thiophene ring}}$ ;  $^1\text{H}$  and  $^{13}\text{C}$  NMR (**Table 3S** and **4S**).

### Synthesis of **9**

Rifampicin (212.1 mg, 0.25 mmol) was dissolved in 10 ml  $\text{C}_2\text{H}_5\text{OH}$  with 0.025 mmol HCl. To reaction mixture (room temperature) reductant  $\text{NaBH}_3\text{CN}$  (15.7 mg, 0.025 mmol) was added portionwise during 20 min. The reaction mixture was evaporated to dryness, dissolved in 30 ml of ethyl acetate and extracted twice with 30 ml of water and brine. The separated organic layer was evaporated and the reduced rifampicin (compound **9**) were purified by column chromatography with silica gel (25 cm  $\times$  1 cm, silica gel 60, 0.040-0.063 mm/230-400 mesh ASTM, Fluka) and ethyl acetate/methanol as eluent (40:1). TLC (10:1 ethyl acetate:methanol as eluent) was developed. Compound **9** was obtained as orange solid.

**9**: Yield: 75%; Elemental analysis  $\text{C}_{43}\text{H}_{60}\text{N}_4\text{O}_{12}$ : calculated C=62.60%, H=7.33%, N=6.79%; found C=62.52%, H=7.30%, N=6.74%; m.p.= 180-186°C; HR-MALDI-TOF  $[\text{M}+\text{H}]^+$  825.4273; FT-IR (KBr, 1.5 mg):  $3440$  and  $3392\text{ cm}^{-1}$   $\nu(\text{O}_{21}\text{-H})+\nu(\text{O}_{23}\text{-H})$ ,  $3345\text{ cm}^{-1}$   $\nu(\text{N}_{\text{amide-H}})$ ,  $3230\text{ cm}^{-1}$   $\nu(\text{N}_{40}^+\text{-H})$ ,  $3070\text{ cm}^{-1}$   $\nu(\text{O}_4\text{-H}\cdots\text{O}_{11})$ ,  $2450\text{ cm}^{-1}$   $\nu(\text{O}_1\text{-H}\cdots\text{O}_8^-)$ ,  $1723\text{ cm}^{-1}$   $\nu(\text{C}_{35}=\text{O})$ ,  $1648\text{ cm}^{-1}$   $\nu(\text{C}_{15}=\text{O})_{\text{amide I}}$ ,  $1584\text{ cm}^{-1}$   $\nu(\text{C}=\text{C})_{\text{naphthalene}}$ ,  $1561\text{ cm}^{-1}$   $\nu(\text{C}=\text{C})$ ,  $1536\text{ cm}^{-1}$   $\nu(\text{C-N})_{\text{amide II}}$ ,  $1457$  and  $1437\text{ cm}^{-1}$   $\nu(\text{C}=\text{C})$ ,  $1253$  and  $1236\text{ cm}^{-1}$   $\nu(\text{C-O})$ ;  $^1\text{H}$  and  $^{13}\text{C}$  NMR (**Table 3S** and **4S**).

**Table 1S.** Selected hydrogen-bond parameters.

**a) intramolecular hydrogen bonds**

| $D-H\cdots A$                                          | $D-H$ (Å) | $H\cdots A$ (Å) | $D\cdots A$ (Å) | $D-H\cdots A$ (°) |
|--------------------------------------------------------|-----------|-----------------|-----------------|-------------------|
| <b>1-CH<sub>3</sub>CCl<sub>3</sub></b>                 |           |                 |                 |                   |
| O1—H1...O15                                            | 0.84      | 1.64            | 2.457 (6)       | 164               |
| O8—H8...O1                                             | 0.84      | 1.76            | 2.510 (6)       | 148               |
| O21—H21...O23                                          | 0.84      | 2.01            | 2.744 (6)       | 146               |
| O4—H4O...O11                                           | 0.84      | 1.75            | 2.567 (6)       | 164               |
| N2—H2N...N38                                           | 0.90      | 1.88            | 2.670 (7)       | 145               |
| <b>1-CH<sub>3</sub>OH-H<sub>2</sub>O</b>               |           |                 |                 |                   |
| O1—H1...O8                                             | 0.84      | 1.75            | 2.497 (3)       | 148               |
| O21—H21O...O23                                         | 0.84      | 1.99            | 2.732 (3)       | 147               |
| O4—H4O...O11                                           | 0.84      | 1.71            | 2.553 (3)       | 178               |
| N2—H2N...N38                                           | 0.90      | 2.00            | 2.701 (3)       | 134               |
| <b>2-CH<sub>3</sub>OH-CH<sub>2</sub>Cl<sub>2</sub></b> |           |                 |                 |                   |
| O1—H1...O8                                             | 0.84      | 1.76            | 2.507 (3)       | 146               |
| O23—H23O...O21                                         | 0.84      | 2.04            | 2.752 (3)       | 141               |
| O4—H4O...O11                                           | 0.84      | 1.74            | 2.582 (3)       | 178               |
| N38—H2N3...O15                                         | 0.90      | 2.08            | 2.893 (3)       | 150               |

**b) intermolecular hydrogen bonds**

| $D-H\cdots A$                            | $D-H$ (Å) | $H\cdots A$ (Å) | $D\cdots A$ (Å) | $D-H\cdots A$ (°) |
|------------------------------------------|-----------|-----------------|-----------------|-------------------|
| <b>1-CH<sub>3</sub>CCl<sub>3</sub></b>   |           |                 |                 |                   |
| O23—H23O...N40 <sup>i</sup>              | 0.84      | 1.98            | 2.806 (6)       | 170               |
| <b>1-CH<sub>3</sub>OH-H<sub>2</sub>O</b> |           |                 |                 |                   |
| O1A—H1OA...O15                           | 0.84      | 1.95            | 2.763 (3)       | 162               |
| O1D—H2OD...O11                           | 0.84      | 1.85            | 2.678 (3)       | 169               |
| O1E—H1OE...O21                           | 0.84      | 1.95            | 2.786 (3)       | 175               |
| O1C—H2OC...O1E <sup>ii</sup>             | 0.84      | 1.94            | 2.691 (4)       | 147               |
| O23—H23O...O4 <sup>iii</sup>             | 0.84      | 2.00            | 2.828 (3)       | 170               |
| O1B—H1OB...O1D                           | 0.84      | 2.04            | 2.874 (4)       | 173               |
| O1D—H1OD...O8 <sup>iv</sup>              | 0.84      | 1.98            | 2.796 (3)       | 165               |

|                                                        |      |      |            |     |
|--------------------------------------------------------|------|------|------------|-----|
| O1E—H2OE...O1D <sup>iii</sup>                          | 0.84 | 2.05 | 2.888 (3)  | 176 |
| O1C—H1OC...O27                                         | 0.84 | 1.95 | 2.772 (4)  | 166 |
| N40—H40N...O1C <sup>v</sup>                            | 0.90 | 1.79 | 2.668 (4)  | 165 |
| <b>2-CH<sub>2</sub>Cl<sub>2</sub>-CH<sub>3</sub>OH</b> |      |      |            |     |
| O1C—H1C...O11                                          | 0.84 | 1.88 | 2.654 (18) | 153 |
| O1C'—H1C'...O11                                        | 0.84 | 1.82 | 2.65 (3)   | 172 |
| O1D—H1D...O15                                          | 0.84 | 2.09 | 2.872 (5)  | 155 |
| O1D'—H1D'...O1                                         | 0.84 | 2.26 | 3.056 (15) | 159 |
| N2—H1N2...O1A                                          | 0.90 | 1.99 | 2.850 (4)  | 160 |
| O1A—H1A...O21                                          | 0.84 | 1.92 | 2.756 (3)  | 173 |
| O21—H21O...O1C <sup>vi</sup>                           | 0.84 | 1.86 | 2.677 (19) | 163 |
| O21—H21O...O1C <sup>vi</sup>                           | 0.84 | 1.94 | 2.77 (3)   | 169 |
| N38—H1N3...O23 <sup>vii</sup>                          | 0.90 | 1.95 | 2.828 (3)  | 164 |
| N38—H2N3...O35 <sup>vii</sup>                          | 0.90 | 2.34 | 2.813 (3)  | 112 |

Symmetry code(s): (i)  $x+1, y, z$ ; (ii)  $x-1, y, z$ ; (iii)  $-x+3/2, -y+1, z-1/2$ ; (iv)  $-x+1, y+1/2, -z+3/2$ ; (v)  $-x+3/2, -y+1, z+1/2$ ; (vi)  $-x+1, y-1/2, -z+1$ ; (vii)  $-x+1, y+1/2, -z+1$ .

**Table 2S.** Crystal data and details of structure refinement

| Compound reference                                                             | <b>1-CH<sub>3</sub>CCl<sub>3</sub></b>                                                                            | <b>1-CH<sub>3</sub>OH-H<sub>2</sub>O</b>                                                                  | <b>2-CH<sub>3</sub>OH-CH<sub>2</sub>Cl<sub>2</sub></b>                                                                     |
|--------------------------------------------------------------------------------|-------------------------------------------------------------------------------------------------------------------|-----------------------------------------------------------------------------------------------------------|----------------------------------------------------------------------------------------------------------------------------|
| Chemical formula                                                               | C <sub>43</sub> H <sub>58</sub> N <sub>4</sub> O <sub>12</sub> ·2(C <sub>2</sub> H <sub>3</sub> Cl <sub>3</sub> ) | C <sub>43</sub> H <sub>58</sub> N <sub>4</sub> O <sub>12</sub> ·2(CH <sub>3</sub> OH)·3(H <sub>2</sub> O) | (C <sub>41</sub> H <sub>54</sub> N <sub>2</sub> O <sub>12</sub> )·3(CH <sub>3</sub> OH)·(CH <sub>2</sub> Cl <sub>2</sub> ) |
| Formula Mass                                                                   | 1089.72                                                                                                           | 941.07                                                                                                    | 947.91                                                                                                                     |
| Crystal system                                                                 | Monoclinic                                                                                                        | Orthorhombic                                                                                              | Monoclinic                                                                                                                 |
| <i>a</i> /Å                                                                    | 10.9716 (4)                                                                                                       | 13.8494 (6)                                                                                               | 9.2035 (1)                                                                                                                 |
| <i>b</i> /Å                                                                    | 18.7546 (6)                                                                                                       | 17.4243 (7)                                                                                               | 20.0206 (1)                                                                                                                |
| <i>c</i> /Å                                                                    | 13.2194 (4)                                                                                                       | 20.0324 (9)                                                                                               | 13.8049 (1)                                                                                                                |
| $\alpha$ /°                                                                    | 90                                                                                                                | 90                                                                                                        | 90                                                                                                                         |
| $\beta$ /°                                                                     | 101.595 (3)                                                                                                       | 90                                                                                                        | 103.152 (1)                                                                                                                |
| $\gamma$ /°                                                                    | 90                                                                                                                | 90                                                                                                        | 90                                                                                                                         |
| Unit cell volume/Å <sup>3</sup>                                                | 2664.62 (15)                                                                                                      | 4834.1 (4)                                                                                                | 2476.96 (3)                                                                                                                |
| Temperature/K                                                                  | 130                                                                                                               | 130                                                                                                       | 130                                                                                                                        |
| Space group                                                                    | <i>P</i> 2 <sub>1</sub>                                                                                           | <i>P</i> 2 <sub>1</sub> 2 <sub>1</sub> 2 <sub>1</sub>                                                     | <i>P</i> 2 <sub>1</sub>                                                                                                    |
| No. of formula units per unit cell, Z                                          | 2                                                                                                                 | 4                                                                                                         | 2                                                                                                                          |
| Radiation type                                                                 | Mo <i>K</i> α                                                                                                     | Mo <i>K</i> α                                                                                             | Cu <i>K</i> α                                                                                                              |
| Absorption coefficient, μ/mm <sup>-1</sup>                                     | 0.38                                                                                                              | 0.10                                                                                                      | 1.73                                                                                                                       |
| No. of reflections measured                                                    | 21144                                                                                                             | 18270                                                                                                     | 40851                                                                                                                      |
| No. of independent reflections                                                 | 4837                                                                                                              | 4875                                                                                                      | 5207                                                                                                                       |
| <i>R</i> <sub>int</sub>                                                        | 0.036                                                                                                             | 0.042                                                                                                     | 0.030                                                                                                                      |
| Final <i>R</i> <sub>i</sub> values ( <i>I</i> > 2σ( <i>I</i> ))                | 0.054                                                                                                             | 0.040                                                                                                     | 0.047                                                                                                                      |
| Final w <i>R</i> ( <i>F</i> <sup>2</sup> ) values ( <i>I</i> > 2σ( <i>I</i> )) | 0.139                                                                                                             | 0.095                                                                                                     | 0.138                                                                                                                      |
| Final <i>R</i> <sub>i</sub> values (all data)                                  | 0.080                                                                                                             | 0.048                                                                                                     | 0.047                                                                                                                      |
| Final w <i>R</i> ( <i>F</i> <sup>2</sup> ) values (all data)                   | 0.165                                                                                                             | 0.100                                                                                                     | 0.138                                                                                                                      |
| Goodness of fit on <i>F</i> <sup>2</sup>                                       | 1.05                                                                                                              | 1.05                                                                                                      | 1.06                                                                                                                       |

**Table 3S.** Total assignment of  $^1\text{H}$  NMR  $\delta$  [ppm] chemical shifts and coupling constants  $J$ [Hz] for **1-9** and **Ral** (rifaldehyde) in  $\text{CDCl}_3$ .

| Atom number | Ral                                                                          | 1                                                                            | 2                                              | 3              | 4                                              | 5                                              | 6                                              | 7               | 8                                              | 9                                             |
|-------------|------------------------------------------------------------------------------|------------------------------------------------------------------------------|------------------------------------------------|----------------|------------------------------------------------|------------------------------------------------|------------------------------------------------|-----------------|------------------------------------------------|-----------------------------------------------|
| 1           | ---                                                                          | ---                                                                          | ---                                            | ---            | ---                                            | ---                                            | ---                                            | ---             | ---                                            | ---                                           |
| 2           | ---                                                                          | ---                                                                          | ---                                            | ---            | ---                                            | ---                                            | ---                                            | ---             | ---                                            | ---                                           |
| 3           | ---                                                                          | ---                                                                          | ---                                            | ---            | ---                                            | ---                                            | ---                                            | ---             | ---                                            | ---                                           |
| 4           | ---                                                                          | ---                                                                          | ---                                            | ---            | ---                                            | ---                                            | ---                                            | ---             | ---                                            | ---                                           |
| 5           | ---                                                                          | ---                                                                          | ---                                            | ---            | ---                                            | ---                                            | ---                                            | ---             | ---                                            | ---                                           |
| 6           | ---                                                                          | ---                                                                          | ---                                            | ---            | ---                                            | ---                                            | ---                                            | ---             | ---                                            | ---                                           |
| 7           | ---                                                                          | ---                                                                          | ---                                            | ---            | ---                                            | ---                                            | ---                                            | ---             | ---                                            | ---                                           |
| 8           | ---                                                                          | ---                                                                          | ---                                            | ---            | ---                                            | ---                                            | ---                                            | ---             | ---                                            | ---                                           |
| 9           | ---                                                                          | ---                                                                          | ---                                            | ---            | ---                                            | ---                                            | ---                                            | ---             | ---                                            | ---                                           |
| 10          | ---                                                                          | ---                                                                          | ---                                            | ---            | ---                                            | ---                                            | ---                                            | ---             | ---                                            | ---                                           |
| 11          | ---                                                                          | ---                                                                          | ---                                            | ---            | ---                                            | ---                                            | ---                                            | ---             | ---                                            | ---                                           |
| 12          | ---                                                                          | ---                                                                          | ---                                            | ---            | ---                                            | ---                                            | ---                                            | ---             | ---                                            | ---                                           |
| 13          | 3H<br>1.82 (s)                                                               | 3H<br>1.81 (s)                                                               | 3H<br>1.74 (s)                                 | 3H<br>1.79 (s) | 3H<br>1.78 (s)                                 | 3H<br>1.77 (s)                                 | 3H<br>1.78 (s)                                 | 3H<br>1.74 (s)  | 3H<br>1.76 (s)                                 | 3H<br>1.78 (s)                                |
| 14          | 3H<br>2.27 (s)                                                               | 3H<br>2.21 (s)                                                               | 3H<br>2.03 (s)                                 | 3H<br>2.04 (s) | 3H<br>2.01 (s)*                                | 3H<br>2.02 (s)*                                | 3H<br>2.05 (s)                                 | 3H<br>2.00 (s)* | 3H<br>2.03 (s)                                 | 3H<br>2.21 (s)                                |
| 15          | ---                                                                          | ---                                                                          | ---                                            | ---            | ---                                            | ---                                            | ---                                            | ---             | ---                                            | ---                                           |
| 16          | ---                                                                          | ---                                                                          | ---                                            | ---            | ---                                            | ---                                            | ---                                            | ---             | ---                                            | ---                                           |
| 17          | 1H<br>6.51 (d)<br>$^3J_{\text{H17-H18}}=11.4$                                | 1H<br>6.39 (d)<br>$^3J_{\text{H17-H18}}=11.1$                                | 1H<br>6.27 (d)<br>$^3J_{\text{H17-H18}}=10.8$  | 1H<br>6.24 (m) | 1H<br>6.28 (d)<br>$^3J_{\text{H17-H18}}=10.4$  | 1H<br>6.28 (d)<br>$^3J_{\text{H17-H18}}=10.6$  | 1H<br>6.28 (d)<br>$^3J_{\text{H17-H18}}=10.8$  | 1H<br>6.23 (m)  | 1H<br>6.26 (d)<br>$^3J_{\text{H17-H18}}=10.1$  | 1H<br>6.27 (d)<br>$^3J_{\text{H17-H18}}=10.9$ |
| 18          | 1H<br>6.57 (dd)<br>$^3J_{\text{H18-H19}}=14.9$                               | 1H<br>6.58 (dd)<br>$^3J_{\text{H18-H19}}=15.2$                               | 1H<br>6.55 (dd)<br>$^3J_{\text{H18-H19}}=15.0$ | 1H<br>6.48 (m) | 1H<br>6.55 (dd)<br>$^3J_{\text{H18-H19}}=15.5$ | 1H<br>6.56 (dd)<br>$^3J_{\text{H18-H19}}=15.8$ | 1H<br>6.50 (dd)<br>$^3J_{\text{H18-H19}}=15.1$ | 1H<br>6.52 (m)  | 1H<br>6.48 (dd)<br>$^3J_{\text{H18-H19}}=14.9$ | 1H<br>6.46 (d)<br>$^3J_{\text{H18-H19}}=15.4$ |
| 19          | 1H<br>6.07 (dd)<br>$^3J_{\text{H19-H20}}=5.0$                                | 1H<br>5.93 (dd)<br>$^3J_{\text{H19-H20}}=4.9$                                | 1H<br>6.11 (dd)<br>$^3J_{\text{H19-H20}}=6.0$  | 1H<br>6.04 (m) | 1H<br>6.11 (dd)<br>$^3J_{\text{H19-H20}}=6.7$  | 1H<br>6.10 (dd)<br>$^3J_{\text{H19-H20}}=6.7$  | 1H<br>6.15 (dd)<br>$^3J_{\text{H19-H20}}=5.9$  | 1H<br>6.07 (m)  | 1H<br>6.07 (m)                                 | 1H<br>5.97 (m)                                |
| 20          | 1H<br>2.43 (m)                                                               | 1H<br>2.38 (m)                                                               | 1H<br>2.38 (m)                                 | 1H<br>2.38 (m) | 1H<br>2.38 (m)                                 | 1H<br>2.40 (m)                                 | 1H<br>2.39 (m)                                 | 1H<br>2.33 (m)  | 1H<br>2.37 (m)                                 | 1H<br>2.42 (m)                                |
| 21          | 1H<br>3.78 (d)<br>$^3J_{\text{H16-H17}}=9.5$                                 | 1H<br>3.78 (d)<br>$^3J_{\text{H16-H17}}=9.5$                                 | 1H<br>3.71 (d)<br>$^3J_{\text{H16-H17}}=9.1$   | 1H<br>3.73 (m) | 1H<br>3.71 (d)<br>$^3J_{\text{H16-H17}}=9.4$   | 1H<br>3.73 (d)<br>$^3J_{\text{H16-H17}}=9.8$   | 1H<br>3.71 (d)<br>$^3J_{\text{H16-H17}}=8.9$   | 1H<br>3.72 (m)  | 1H<br>3.72 (d)<br>$^3J_{\text{H16-H17}}=8.6$   | 1H<br>3.85 (m)                                |
| 22          | 1H<br>1.76 (m)                                                               | 1H<br>1.71 (m)                                                               | 1H<br>1.71 (m)                                 | 1H<br>1.75 (m) | 1H<br>1.75 (m)                                 | 1H<br>1.75 (m)                                 | 1H<br>1.76 (m)                                 | 1H<br>1.75 (m)  | 1H<br>1.73 (m)                                 | 1H<br>1.81 (m)                                |
| 23          | 1H<br>3.05 (m)*                                                              | 1H<br>3.02 (m)*                                                              | 1H<br>2.97 (m)*                                | 1H<br>2.97 (m) | 1H<br>2.97 (m)                                 | 1H<br>2.98 (m)                                 | 1H<br>3.00 (m)                                 | 1H<br>2.95 (m)  | 1H<br>2.97 (m)                                 | 1H<br>3.03 (m)                                |
| 24          | 1H<br>1.54 (qd)<br>$^3J_{\text{H24-H33}}=6.8$<br>$^3J_{\text{H23-H24}}=14.0$ | 1H<br>1.53 (qd)<br>$^3J_{\text{H24-H33}}=6.8$<br>$^3J_{\text{H23-H24}}=14.0$ | 1H<br>1.43 (m)                                 | 1H<br>1.39 (m) | 1H<br>1.44 (m)                                 | 1H<br>1.45 (m)                                 | 1H<br>1.45 (m)                                 | 1H<br>1.43 (m)  | 1H<br>1.39 (m)                                 | 1H<br>1.56 (m)                                |

|      |                                         |                                         |                                         |                  |                                         |                                         |                                         |                                       |                                                              |                                                              |
|------|-----------------------------------------|-----------------------------------------|-----------------------------------------|------------------|-----------------------------------------|-----------------------------------------|-----------------------------------------|---------------------------------------|--------------------------------------------------------------|--------------------------------------------------------------|
| 25   | 1H<br>4.94 (d)<br>$^3J_{H25-H26}=10.0$  | 1H<br>4.95 (d)<br>$^3J_{H25-H26}=10.6$  | 1H<br>4.90 (d)<br>$^3J_{H25-H26}=10.5$  | 1H<br>4.89 (bs)  | 1H<br>4.87 (d)<br>$^3J_{H25-H26}=10.6$  | 1H<br>4.87 (d)<br>$^3J_{H25-H26}=10.6$  | 1H<br>4.88 (d)<br>$^3J_{H25-H26}=10.8$  | 1H<br>4.91 (bs)                       | 1H<br>4.89 (d)<br>$^3J_{H25-H26}=10.4$                       | 1H<br>4.92 (d)<br>$^3J_{H25-H26}=10.4$                       |
| 26   | 1H<br>1.37 (m)                          | 1H<br>1.35 (m)                          | 1H<br>1.32 (m)                          | 1H<br>1.45 (m)   | 1H<br>1.37 (m)                          | 1H<br>1.29 (m)                          | 1H<br>1.45 (m)                          | 1H<br>1.39 (m)                        | 1H<br>1.38 (m)                                               | 1H<br>1.43 (m)                                               |
| 27   | 1H<br>3.51 (d)<br>$^3J_{H27-H28}=7.0$   | 1H<br>3.51 (d)<br>$^3J_{H27-H28}=6.7$   | 1H<br>3.34 (d)<br>$^3J_{H27-H28}=6.6$   | 1H<br>3.34 (m)   | 1H<br>3.37 (d)<br>$^3J_{H27-H28}=6.9$   | 1H<br>3.38 (d)<br>$^3J_{H27-H28}=6.6$   | 1H<br>3.39 (d)<br>$^3J_{H27-H28}=7.0$   | 1H<br>3.36 (m)                        | 1H<br>3.31 (m)                                               | 1H<br>3.51 (d)<br>$^3J_{H27-H28}=6.9$                        |
| 28   | 1H<br>5.12 (dd)<br>$^3J_{H28-H29}=12.7$ | 1H<br>5.10 (dd)<br>$^3J_{H28-H29}=12.6$ | 1H<br>5.06 (dd)<br>$^3J_{H28-H29}=12.5$ | 1H<br>5.07 (m)   | 1H<br>5.05 (dd)<br>$^3J_{H28-H29}=12.5$ | 1H<br>5.05 (dd)<br>$^3J_{H28-H29}=12.6$ | 1H<br>5.08 (dd)<br>$^3J_{H28-H29}=12.5$ | 1H<br>5.02 (m)                        | 1H<br>5.11 (dd)<br>$^3J_{H27-H28}=6.8$<br>$J_{H28-H29}=12.3$ | 1H<br>5.07 (dd)<br>$^3J_{H27-H28}=7.0$<br>$J_{H28-H29}=12.6$ |
| 29   | 1H<br>6.24 (d)                          | 1H<br>6.20 (d)                          | 1H<br>6.03 (d)                          | 1H<br>6.02 (m)   | 1H<br>6.01 (d)                          | 1H<br>6.03 (d)                          | 1H<br>6.12 (d)                          | 1H<br>6.02 (m)                        | 1H<br>6.02 (d)                                               | 1H<br>6.23 (d)                                               |
| 30   | 3H<br>2.07 (s)*                         | 3H<br>2.09 (s)                          | 3H<br>2.08 (s)                          | 3H<br>2.05 (s)   | 3H<br>2.09 (s)                          | 3H<br>2.08 (s)                          | 3H<br>2.07 (s)                          | 3H<br>2.02 (s)                        | 3H<br>2.06 (s)                                               | 3H<br>2.11 (s)                                               |
| 31   | 3H<br>0.91 (d)<br>$^3J_{H20-H31}=7.0$   | 3H<br>0.88 (d)<br>$^3J_{H20-H31}=7.0$   | 3H<br>0.84 (d)<br>$^3J_{H20-H31}=6.9$   | 3H<br>0.84 (bs)  | 3H<br>0.85 (d)<br>$^3J_{H20-H31}=7.1$   | 3H<br>0.86 (d)<br>$^3J_{H20-H31}=6.9$   | 3H<br>0.86 (d)<br>$^3J_{H20-H31}=6.8$   | 3H<br>0.81 (m)                        | 3H<br>0.84 (d)<br>$^3J_{H20-H31}=6.7$                        | 3H<br>0.93 (d)<br>$^3J_{H20-H31}=7.1$                        |
| 32   | 3H<br>1.03 (d)<br>$^3J_{H22-H32}=7.0$   | 3H<br>1.01 (d)<br>$^3J_{H22-H32}=7.0$   | 3H<br>0.96 (d)<br>$^3J_{H22-H32}=6.9$   | 3H<br>1.00 (m)   | 3H<br>0.99 (d)<br>$^3J_{H22-H32}=6.8$   | 3H<br>0.98 (d)<br>$^3J_{H22-H32}=7.1$   | 3H<br>1.00 (d)<br>$^3J_{H22-H32}=6.9$   | 3H<br>0.96 (m)                        | 3H<br>0.99 (d)<br>$^3J_{H22-H32}=6.4$                        | 3H<br>1.03 (d)<br>$^3J_{H22-H32}=7.1$                        |
| 33   | 3H<br>0.67 (d)<br>$^3J_{H24-H33}=6.9$   | 3H<br>0.59 (d)<br>$^3J_{H24-H33}=6.9$   | 3H<br>0.50 (d)<br>$^3J_{H24-H33}=6.6$   | 3H<br>0.55 (bs)  | 3H<br>0.52 (d)<br>$^3J_{H24-H33}=6.8$   | 3H<br>0.49 (d)<br>$^3J_{H24-H33}=6.8$   | 3H<br>0.56 (d)<br>$^3J_{H24-H33}=6.8$   | 3H<br>0.50 (d)<br>$^3J_{H24-H33}=6.6$ | 3H<br>0.50 (d)<br>$^3J_{H24-H33}=6.8$                        | 3H<br>0.70 (d)<br>$^3J_{H24-H33}=6.9$                        |
| 34   | 3H<br>-0.30 (d)<br>$^3J_{H26-H36}=6.9$  | 3H<br>-0.31 (d)<br>$^3J_{H26-H36}=6.9$  | 3H<br>-0.29 (d)<br>$^3J_{H26-H36}=6.5$  | 3H<br>-0.30 (bs) | 3H<br>-0.27 (d)<br>$^3J_{H26-H36}=7.1$  | 3H<br>-0.25 (d)<br>$^3J_{H26-H36}=6.7$  | 3H<br>-0.23 (d)<br>$^3J_{H26-H36}=6.9$  | 3H<br>-0.30 (bs)                      | 3H<br>-0.33 (d)<br>$^3J_{H26-H36}=6.1$                       | 3H<br>-0.33 (d)<br>$^3J_{H26-H36}=6.9$                       |
| 35   | ---                                     | ---                                     | ---                                     | ---              | ---                                     | ---                                     | ---                                     | ---                                   | ---                                                          | ---                                                          |
| 36   | 3H<br>2.06 (s)*                         | 3H<br>2.06 (s)                          | 3H<br>2.01 (s)                          | 3H<br>2.00 (s)   | 3H<br>2.01 (s)*                         | 3H<br>2.01 (s)*                         | 3H<br>2.03 (s)                          | 3H<br>2.01 (s)                        | 3H<br>1.99 (s)                                               | 3H<br>2.07 (s)                                               |
| 37   | 3H<br>3.05 (s)                          | 3H<br>3.04 (s)*                         | 3H<br>2.98 (s)*                         | 3H<br>3.01 (s)*  | 3H<br>2.99 (s)*                         | 3H<br>2.99 (s)*                         | 3H<br>3.03 (s)*                         | 3H<br>2.97 (s)                        | 3H<br>2.99 (s)*                                              | 3H<br>3.04 (s)                                               |
| 38   | 1H<br>10.65 (s)                         | 1H<br>8.25 (s)                          | 1H<br>4.18 (d)<br>$^2J=11.6$            | 1H<br>4.29 (bs)  | 1H<br>4.20 (d)<br>$^2J=11.5$            | 1H<br>4.27 (d)<br>$^2J=11.9$            | 1H<br>4.36 (d)<br>$^2J=11.6$            | 1H<br>4.27 (bs)                       | 1H<br>4.25 (d)<br>$^2J=10.8$                                 | 1H<br>4.49 (d)<br>$^2J=13.3$                                 |
| HO-1 | 1H<br>12.30 (s)                         | 1H<br>13.19 (s)                         | 1H<br>15.96 (bs)                        | 1H<br>16.40 (bs) | 1H<br>16.15 (bs)                        | 1H<br>16.05 (bs)                        | 1H<br>16.07 (bs)                        | 1H<br>15.93 (bs)                      | 1H<br>16.20 (bs)                                             | 1H<br>13.20 (s)                                              |
| HO-4 | 1H<br>12.65 (s)                         | 1H<br>11.98 (s)                         | 1H<br>12.73 (s)                         | 1H<br>12.68 (s)  | 1H<br>12.69 (s)                         | 1H<br>12.85 (s)                         | 1H<br>12.92 (s)                         | 1H<br>12.70 (s)                       | 1H<br>12.59 (s)                                              | 1H<br>12.02 (s)                                              |

|                                                  |                 |                   |                                       |                                                           |                  |                                                          |                  |                  |                                                           |                                                          |
|--------------------------------------------------|-----------------|-------------------|---------------------------------------|-----------------------------------------------------------|------------------|----------------------------------------------------------|------------------|------------------|-----------------------------------------------------------|----------------------------------------------------------|
| HO-8                                             | 1H<br>13.16 (s) | 1H<br>13.19 (s)   | ---                                   | ---                                                       | ---              | ---                                                      | ---              | ---              | ---                                                       | 1H<br>12.02 (s)                                          |
| HO-21                                            | 1H<br>3.55 (bs) | 1H<br>3.48 (bs)   | 1H<br>3.09 (bs)                       | 1H<br>3.10 (bs)                                           | 1H<br>3.20 (bs)  | 1H<br>3.15 (bs)                                          | 1H<br>3.35 (bs)  | 1H<br>3.15 (bs)  | 1H<br>3.05 (bs)                                           | 1H<br>3.58 (bs)                                          |
| HO-23                                            | 1H<br>3.63 (bs) | 1H<br>3.69 (bs)   | 1H<br>3.70 (bs)                       | 1H<br>3.84 (bs)                                           | 1H<br>3.86 (bs)  | 1H<br>4.04 (bs)                                          | 1H<br>3.81 (bs)  | 1H<br>4.01 (bs)  | 1H<br>3.80 (bs)                                           | 1H<br>3.75 (bs)                                          |
| HO-40                                            | ---             | ---               | ---                                   | 1.99 (bs)                                                 | ---              | ---                                                      | ---              | ---              | ---                                                       | ---                                                      |
| HO-42                                            | ---             | ---               | ---                                   | ---                                                       | 2.03 (bs)        | ---                                                      | ---              | ---              | ---                                                       | ---                                                      |
| HO-44                                            | ---             | ---               | ---                                   | ---                                                       | ---              | 2.08 (bs)                                                | ---              | ---              | ---                                                       | ---                                                      |
| NH<br>(amid)                                     | 13.75 (s)       | 1H<br>13.30 (vbs) | 1H<br>8.20 (s)                        | 1H<br>8.38 (s)                                            | 1H<br>8.26 (s)   | 1H<br>8.79 (s)                                           | 1H<br>8.30 (s)   | 1H<br>8.76 (s)   | 1H<br>8.00 (s)                                            | 1H<br>8.29 (s)                                           |
| N <sup>+</sup> H<br>(non-<br>hydrogen<br>bonded) | ---             | ---               | 1H<br>3.99 (d)<br><sup>2</sup> J=16.8 | 1H<br>3.92 (bs)                                           | 1H<br>3.90 (bs)  | 1H<br>3.96 (bs)                                          | 1H<br>3.92 (bs)  | 1H<br>4.16 (bs)  | 1H<br>3.95 (m)                                            | ---                                                      |
| N <sup>+</sup> H<br>(hydrogen<br>bonded)         | ---             | ---               | 1H<br>8.29 (vbs)                      | 1H<br>8.21 (vbs)                                          | 1H<br>9.00 (vbs) | 1H<br>8.71 (vbs)                                         | 1H<br>8.25 (vbs) | 1H<br>8.93 (vbs) | 1H<br>8.41 (vbs)                                          | ---                                                      |
| NH                                               | ---             | ---               | ---                                   | ---                                                       | ---              | ---                                                      | ---              | ---              | ---                                                       | 1H<br>2.94 (bs)                                          |
| 39                                               | ---             | 1H<br>3.17 (m)    | 2H<br>3.77 (m)                        | 2H<br>3.43 (m)                                            | 2H<br>3.09 (m)   | 2H<br>3.13 (m)                                           | 2H<br>3.74 (m)   | 2H<br>3.10 (m)   | 2H<br>3.43 (m)                                            | 1H<br>3.16 (m)                                           |
| 40                                               | ---             | 1H<br>2.53 (m)    | 1H<br>3.09 (m)                        | 1H<br>5.98 (m)                                            | 2H<br>4.95 (m)   | 2H<br>1.30 (m)                                           | 2H<br>1.83 (m)   | 2H<br>3.89 (m)   | 2H<br>2.29 (m)                                            | 1H<br>3.41 (m)<br>3.33 (m)                               |
| 41                                               | ---             | 1H<br>2.58 (m)    | 1H<br>3.09 (m)                        | 1H<br>5.56 (d)<br><sup>3</sup> J <sub>H40-H41</sub> =16.8 | ---              | 2H<br>1.73 (m)                                           | 2H<br>1.50 (m)   | 2H<br>3.89 (m)   | 2H<br>3.71 (m)                                            | 1H<br>2.53 (m)<br>1H<br>2.57 (m)                         |
| 42                                               | ---             | 1H<br>2.58 (m)    | 1H<br>3.17 (m)                        | 1H<br>5.51 (d)<br><sup>3</sup> J <sub>H40-H41</sub> =10.2 | ---              | 2H<br>3.82 (t)<br><sup>3</sup> J <sub>H41-H42</sub> =5.0 | 2H<br>1.43 (m)   | 2H<br>3.63 (m)   | 1H<br>7.75 (s)                                            | 1H<br>7.22 (d)<br><sup>3</sup> J <sub>H42-H43</sub> =4.9 |
| 43                                               | ---             | 1H<br>2.53 (m)    | 3H<br>2.34 (s)                        | ---                                                       | ---              | 2H<br>1.54 (m)                                           | 2H<br>3.63 (m)   | 1H<br>7.01 (m)   | 1H<br>6.98 (dd)<br><sup>3</sup> J <sub>H43-H44</sub> =3.2 | 1H<br>3.09 (m)<br>3H<br>2.29 (s)                         |

---

|    |     |     |     |     |     |                                       |                                       |                |                 |     |
|----|-----|-----|-----|-----|-----|---------------------------------------|---------------------------------------|----------------|-----------------|-----|
| 44 | --- | --- | --- | --- | --- | 2H<br>3.60 (t)<br>$^3J_{H41-H42}=5.0$ | 2H<br>1.52 (m)                        | 1H<br>6.98 (m) | 1H<br>7.00 (bs) | --- |
| 45 | --- | --- | --- | --- | --- | ---                                   | 2H<br>1.31 (m)                        | ---            | ---             | --- |
| 46 | --- | --- | --- | --- | --- | ---                                   | 3H<br>0.89 (t)<br>$^3J_{H45-H46}=7.4$ | ---            | ---             | --- |

---



**Table 4S.** Total assignment of  $^{13}\text{C}$  NMR  $\delta$  [ppm] chemical shifts for **1-9** and **Ral** (rifaldehyde) in  $\text{CDCl}_3$ .

| Atom Number | Ral   | 1     | 2     | 3     | 4     | 5     | 6     | 7     | 8     | 9     |
|-------------|-------|-------|-------|-------|-------|-------|-------|-------|-------|-------|
| 1           | 137.8 | 138.5 | 144.9 | 144.9 | 144.9 | 144.8 | 144.9 | 144.9 | 144.7 | 138.6 |
| 2           | 120.6 | 120.4 | 118.2 | 118.1 | 118.1 | 118.4 | 118.4 | 118.3 | 118.1 | 119.0 |
| 3           | 109.7 | 110.8 | 112.1 | 112.5 | 112.2 | 112.4 | 111.5 | 112.4 | 112.1 | 110.6 |
| 4           | 156.0 | 147.9 | 147.8 | 147.4 | 147.9 | 148.0 | 148.0 | 147.9 | 147.9 | 148.0 |
| 5           | 105.5 | 104.5 | 99.3  | 99.1  | 99.4  | 99.3  | 99.2  | 99.5  | 99.7  | 105.4 |
| 6           | 168.6 | 169.2 | 173.3 | 173.1 | 173.4 | 173.2 | 173.2 | 173.2 | 173.5 | 169.3 |
| 7           | 109.5 | 106.0 | 103.4 | 103.3 | 103.2 | 103.3 | 103.3 | 103.4 | 103.5 | 106.2 |
| 8           | 174.8 | 174.4 | 183.0 | 182.5 | 182.1 | 182.6 | 183.0 | 182.7 | 181.7 | 174.2 |
| 9           | 117.4 | 112.8 | 115.3 | 114.9 | 115.0 | 115.2 | 115.4 | 115.3 | 115.0 | 112.6 |
| 10          | 119.1 | 117.9 | 115.8 | 115.6 | 115.6 | 115.6 | 115.6 | 115.6 | 115.8 | 117.0 |
| 11          | 196.6 | 195.4 | 187.3 | 187.7 | 189.8 | 187.5 | 187.7 | 187.6 | 188.5 | 195.3 |
| 12          | 109.2 | 108.7 | 108.5 | 108.3 | 108.4 | 108.4 | 108.6 | 108.5 | 108.4 | 108.9 |
| 13          | 21.5  | 21.4  | 21.3  | 21.0  | 20.9  | 21.1  | 21.4  | 21.1  | 21.2  | 21.7  |
| 14          | 7.8   | 7.5   | 7.3   | 7.1   | 7.2   | 7.3   | 7.1   | 7.4   | 7.3   | 7.4   |
| 15          | 170.4 | 169.6 | 171.6 | 171.3 | 172.0 | 171.5 | 171.6 | 171.7 | 171.8 | 171.5 |
| 16          | 127.8 | 129.3 | 130.9 | 130.5 | 131.1 | 130.7 | 131.1 | 130.9 | 131.0 | 130.6 |
| 17          | 136.9 | 135.1 | 133.6 | 134.0 | 133.3 | 133.6 | 133.6 | 133.6 | 133.5 | 133.6 |
| 18          | 122.6 | 123.2 | 124.6 | 124.5 | 124.2 | 124.8 | 124.4 | 124.7 | 124.3 | 123.5 |
| 19          | 143.7 | 142.7 | 141.5 | 141.6 | 141.9 | 141.3 | 141.6 | 141.3 | 141.7 | 141.5 |
| 20          | 38.6  | 38.5  | 37.8  | 37.7  | 37.8  | 37.6  | 37.8  | 37.8  | 38.0  | 38.2  |
| 21          | 70.7  | 70.6  | 73.3  | 73.2  | 71.9  | 73.3  | 71.4  | 73.3  | 73.0  | 70.9  |
| 22          | 33.3  | 33.3  | 33.3  | 33.2  | 33.2  | 33.1  | 33.3  | 33.1  | 33.3  | 33.3  |
| 23          | 77.0  | 76.8  | 76.9  | 77.0  | 76.8  | 76.9  | 76.8  | 76.8  | 76.8  | 76.8  |
| 24          | 37.6  | 37.5  | 37.5  | 37.3  | 37.5  | 37.4  | 37.4  | 37.5  | 37.6  | 37.5  |
| 25          | 74.2  | 74.4  | 74.0  | 74.0  | 73.8  | 74.1  | 74.1  | 73.9  | 73.8  | 74.4  |
| 26          | 39.6  | 39.5  | 39.0  | 38.7  | 38.4  | 39.0  | 38.8  | 38.9  | 38.7  | 39.6  |
| 27          | 76.5  | 76.7  | 78.1  | 78.2  | 78.8  | 78.1  | 78.9  | 79.0  | 78.8  | 76.7  |
| 28          | 119.4 | 118.6 | 116.8 | 116.2 | 116.3 | 116.7 | 116.2 | 116.6 | 116.8 | 118.1 |
| 29          | 142.8 | 142.6 | 142.6 | 142.5 | 142.9 | 142.4 | 134.1 | 142.1 | 142.8 | 143.0 |
| 30          | 20.5  | 20.5  | 20.3  | 20.5  | 20.4  | 20.5  | 20.3  | 20.4  | 20.4  | 20.6  |
| 31          | 16.9  | 17.8  | 17.8  | 17.7  | 17.8  | 17.8  | 17.9  | 17.7  | 17.7  | 17.3  |
| 32          | 10.9  | 10.8  | 11.0  | 11.1  | 11.1  | 11.1  | 11.0  | 11.1  | 11.1  | 10.9  |
| 33          | 8.6   | 8.4   | 8.6   | 8.7   | 8.7   | 8.7   | 8.7   | 8.8   | 8.8   | 9.0   |
| 34          | 9.1   | 8.9   | 9.1   | 9.1   | 9.5   | 9.0   | 9.3   | 9.1   | 9.4   | 9.1   |
| 35          | 172.1 | 172.0 | 171.9 | 172.0 | 172.6 | 172.1 | 172.3 | 172.9 | 171.8 | 172.2 |
| 36          | 20.7  | 20.5  | 20.8  | 20.8  | 20.7  | 20.8  | 20.8  | 20.8  | 20.9  | 20.7  |
| 37          | 57.1  | 57.0  | 56.7  | 56.8  | 56.8  | 56.8  | 56.7  | 56.8  | 56.7  | 57.0  |
| 38          | 194.1 | 134.4 | 44.5  | 45.5  | 44.8  | 45.2  | 45.3  | 44.5  | 45.5  | 43.4  |
| 39          | ---   | 50.2  | 50.4  | 49.1  | 50.2  | 48.1  | 47.6  | 46.1  | 49.3  | 50.2  |
| 40          | ---   | 53.9  | 127.3 | 25.2  | 74.3  | 25.5  | 65.7  | 29.7  | 27.1  | 53.8  |

|    |     |      |       |      |     |      |      |       |       |      |
|----|-----|------|-------|------|-----|------|------|-------|-------|------|
| 41 | --- | 53.9 | 124.6 | 29.8 | --- | 25.9 | 70.2 | 46.7  | 137.3 | 53.8 |
| 42 | --- | 50.2 | ---   | 61.7 | --- | 24.8 | 70.2 | 137.0 | 125.1 | 50.2 |
| 43 | --- | 45.9 | ---   | ---  | --- | 31.7 | 70.7 | 128.1 | 127.6 | 45.5 |
| 44 | --- | ---  | ---   | ---  | --- | 62.0 | 31.5 | 120.7 | 126.8 | ---  |
| 45 | --- | ---  | ---   | ---  | --- | ---  | 19.2 | ---   | ---   | ---  |
| 46 | --- | ---  | ---   | ---  | --- | ---  | 13.8 | ---   | ---   | ---  |

---

**Table 5S.** Antibacterial activity MIC ( $\mu\text{g/mL}$ ) of **1-9** against Gram-(+) strains including methicillin-resistant /MRSA/ and methicillin-susceptible /MSSA/ ones.

| <b>Bacteria strain</b>           | <b>1</b> | <b>2</b> | <b>3</b> | <b>4</b> | <b>5</b> | <b>6</b> | <b>7</b> | <b>8</b> | <b>9</b> |
|----------------------------------|----------|----------|----------|----------|----------|----------|----------|----------|----------|
| <i>S. aureus</i> NCTC 4163       | 0.008    | 0.5      | 1        | 1        | 0.5      | 0.5      | 2        | 0.5      | 0.008    |
| <i>S. aureus</i> ATCC 25923      | 0.016    | 1        | 2        | 2        | 2        | 1        | 2        | 1        | 0.016    |
| <i>S. aureus</i> ATCC 6538       | 0.008    | 0.5      | 1        | 1        | 1        | 1        | 2        | 0.5      | 0.008    |
| <i>S. aureus</i> ATCC 29213      | 0.008    | 0.5      | 1        | 1        | 2        | 1        | 2        | 0.5      | 0.008    |
| <i>S. epidermidis</i> ATCC 12228 | 0.008    | 0.125    | 0.25     | 0.25     | 0.25     | 0.25     | 1        | 0.25     | 0.008    |
| <i>E. coli</i> ATCC 10538        | 8        | 128      | 256      | 256      | 256      | 256      | >256     | >256     | 16       |
| <i>E. coli</i> ATCC 25922        | 8        | 64       | 256      | 128      | 128      | 128      | >256     | >256     | 16       |
| <i>E. coli</i> NCTC 8196         | 4        | 64       | 256      | 256      | 256      | 256      | >256     | >256     | 8        |
| <i>P. aeruginosa</i> ATCC 15442  | 16       | 128      | >256     | 256      | >256     | >256     | >256     | >256     | 32       |
| <i>P. aeruginosa</i> NCTC 6749   | 32       | 64       | 256      | 256      | >256     | >256     | >256     | >256     | 32       |
| <i>P. aeruginosa</i> ATCC 27853  | 16       | 64       | 256      | 256      | 256      | >256     | >256     | >256     | 32       |
| MSSA 440/11                      | 0.016    | 1        | 2        | 1        | 1        | 1        | 0.25     | 0.5      | 0.03     |
| MSSA 441/11                      | 0.016    | 1        | 2        | 1        | 2        | 1        | 0.5      | 1        | 0.03     |
| MSSA 442/11                      | 0.016    | 0.5      | 2        | 1        | 1        | 0.5      | 0.25     | 1        | 0.03     |
| MSSA 443/11                      | 0.016    | 0.5      | 2        | 2        | 2        | 1        | 0.5      | 1        | 0.03     |
| MSSA 444/11                      | 0.016    | 1        | 4        | 2        | 4        | 1        | 0.5      | 1        | 0.03     |
| MSSA 445/11                      | 0.016    | 1        | 2        | 1        | 2        | 1        | 0.5      | 1        | 0.03     |
| MSSA 446/11                      | 0.016    | 1        | 4        | 2        | 2        | 1        | 0.5      | 1        | 0.03     |
| MSSA 447/11                      | 0.016    | 0.5      | 4        | 1        | 1        | 1        | 0.5      | 1        | 0.03     |
| MSSA 448/11                      | 0.008    | 0.5      | 2        | 1        | 2        | 1        | 0.5      | 0.5      | 0.016    |
| MSSA 449/11                      | 0.008    | 0.5      | 2        | 1        | 1        | 0.5      | 0.25     | 0.5      | 0.016    |
| MRSA 389/10                      | 0.008    | 0.5      | 0.5      | 0.5      | 1        | 0.5      | 1        | 0.25     | 0.008    |
| MRSA 390/10                      | 0.008    | 0.5      | 1        | 1        | 2        | 1        | 2        | 0.5      | 0.008    |
| MRSA 391/10                      | 0.008    | 0.5      | 1        | 1        | 2        | 1        | 2        | 0.5      | 0.008    |
| MRSA 392/10                      | 0.008    | 1        | 1        | 1        | 2        | 1        | 2        | 0.5      | 0.016    |
| MRSA 393/10                      | 0.008    | 0.5      | 0.5      | 0.5      | 2        | 1        | 2        | 1        | 0.008    |
| MRSA 394/10                      | 0.008    | 0.5      | 0.5      | 1        | 2        | 1        | 2        | 1        | 0.008    |
| MRSA 399/10                      | 0.008    | 0.5      | 0.5      | 1        | 1        | 1        | 2        | 0.5      | 0.008    |
| MRSA 450/11                      | 0.008    | 0.5      | 2        | 1        | 2        | 1        | 2        | 1        | 0.008    |
| MRSA 451/11                      | 0.008    | 0.5      | 1        | 0.5      | 2        | 1        | 2        | 1        | 0.008    |
| MRSA 452/11                      | 0.008    | 0.5      | 2        | 0.5      | 2        | 1        | 2        | 1        | 0.008    |

Figure 1S.  $^1\text{H}$ - $^{15}\text{N}$  HMBC spectrum of **1** in DMSO- $d_6$  after addition of water drop.

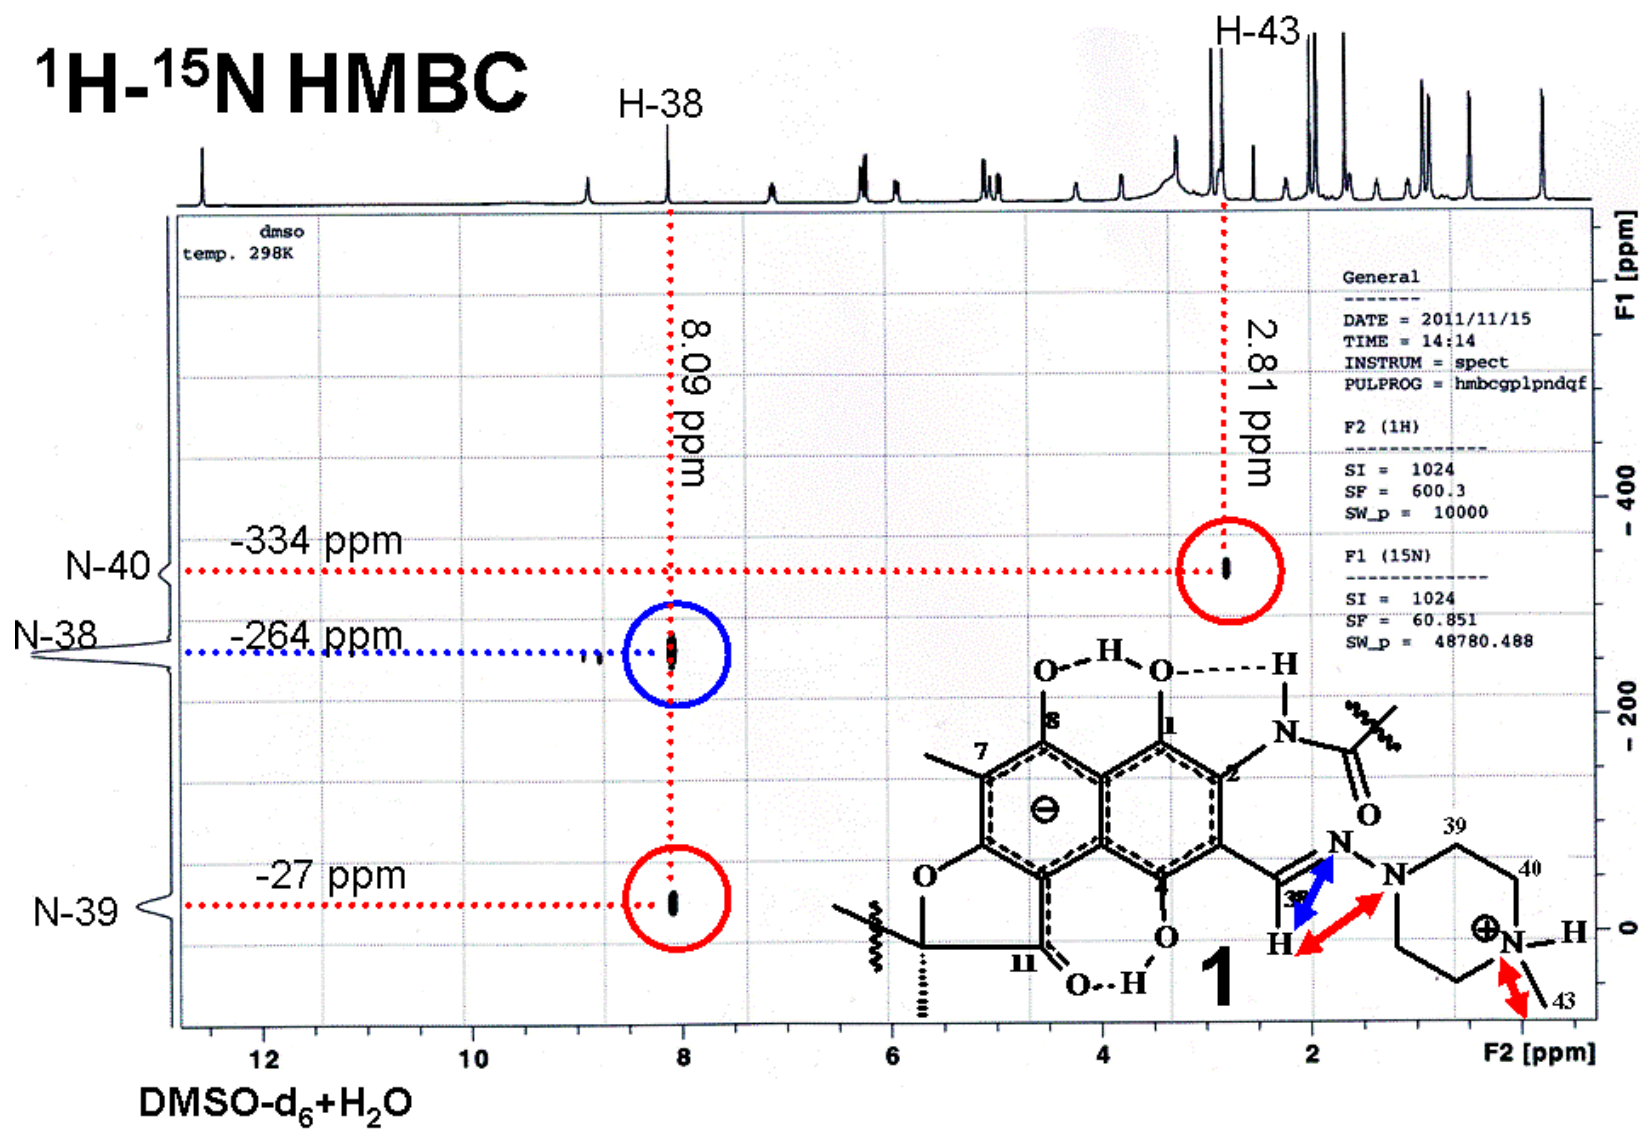

Figure 2S.  $^1\text{H}$ - $^{15}\text{N}$  HSQC spectrum of **1** in DMSO- $\text{d}_6$  after addition of water drop.

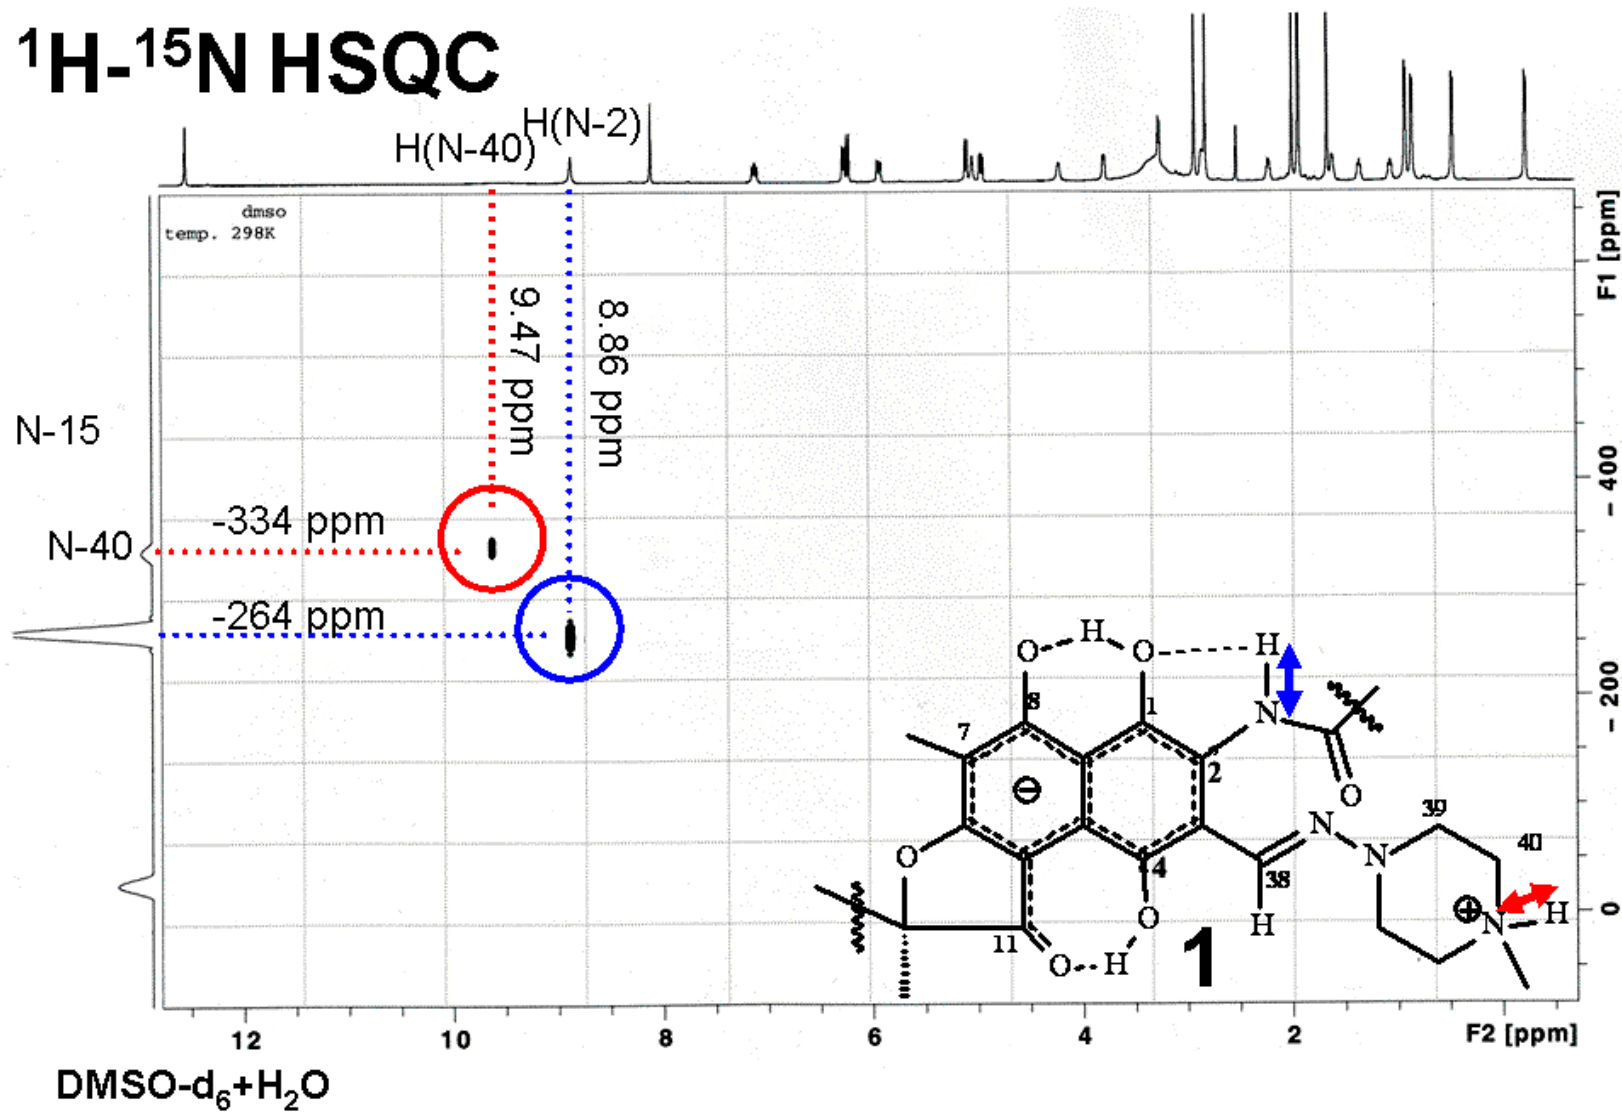

Figure 3S.  $^1\text{H}$ - $^{15}\text{N}$  HMBC spectrum of **2** in DMSO- $\text{d}_6$  after addition of water drop.

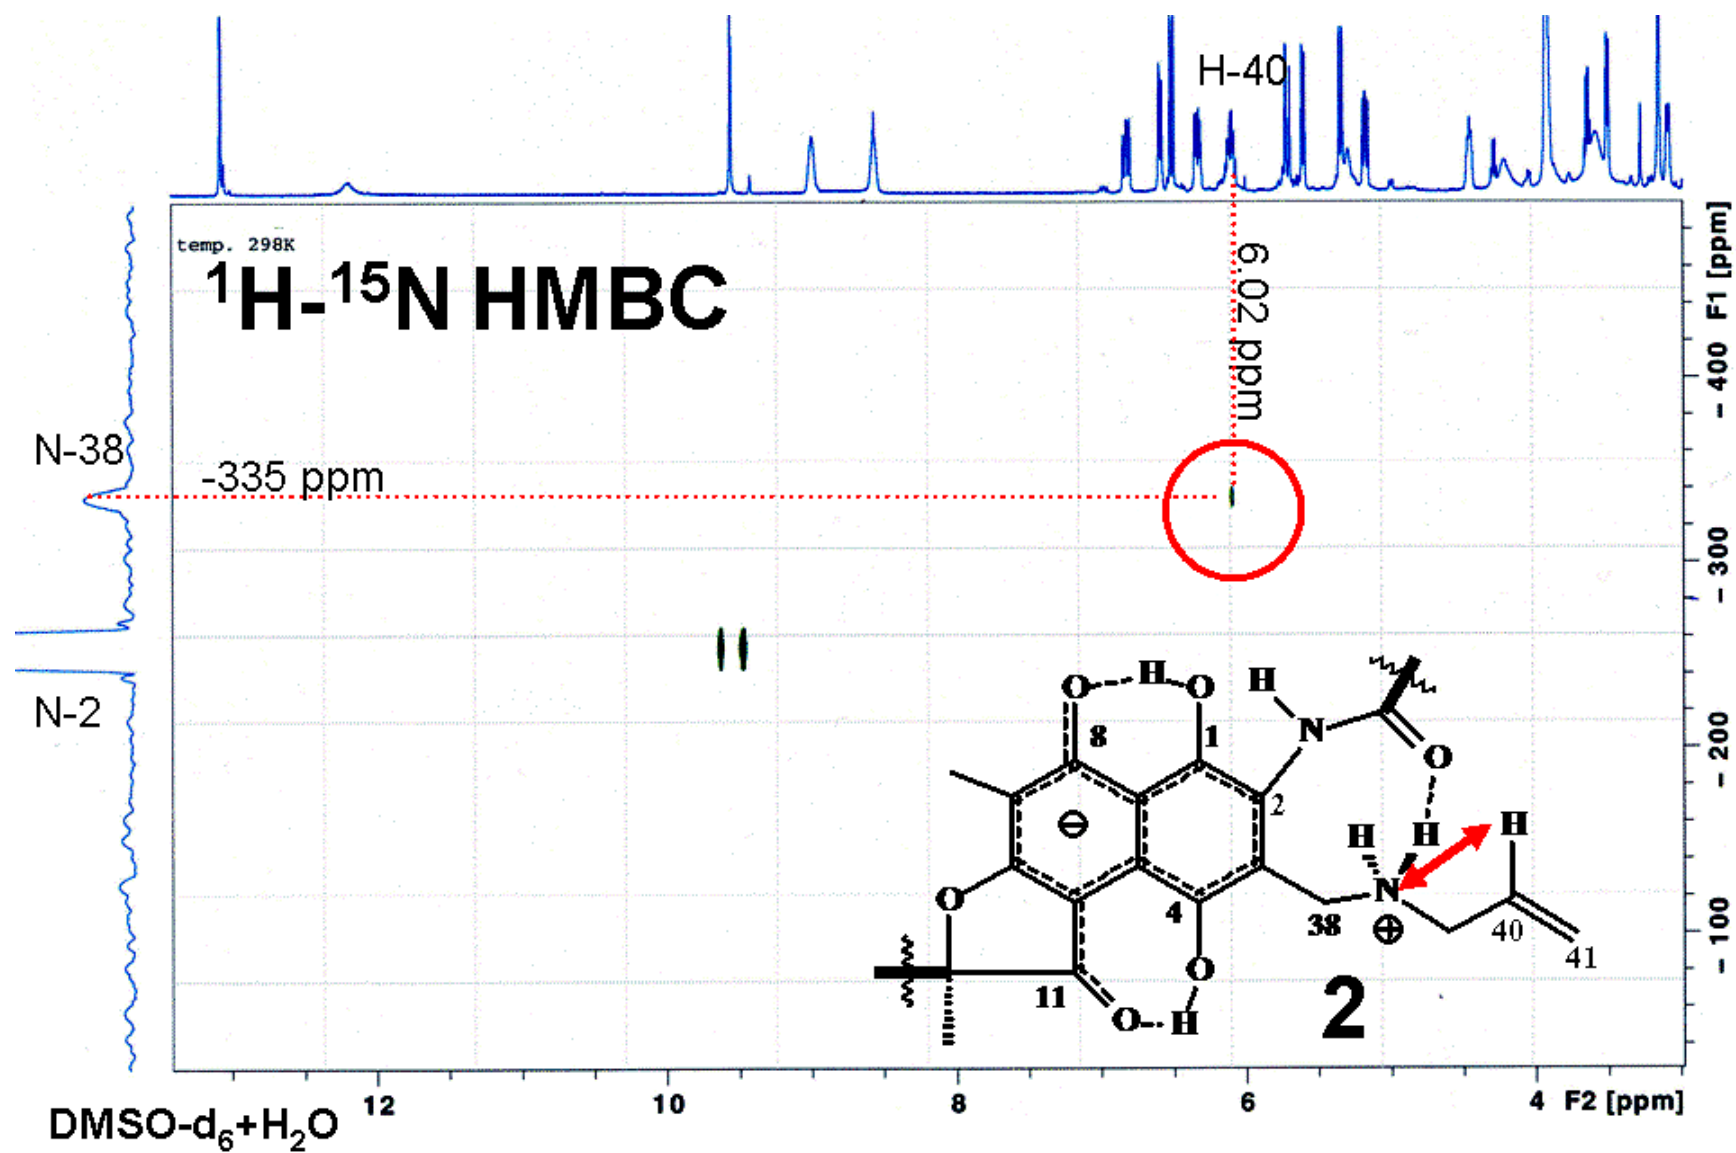

Figure 4S.  $^1\text{H}$ - $^{15}\text{N}$  HSQC spectrum of **2** in  $\text{DMSO-d}_6$  after addition of water drop.

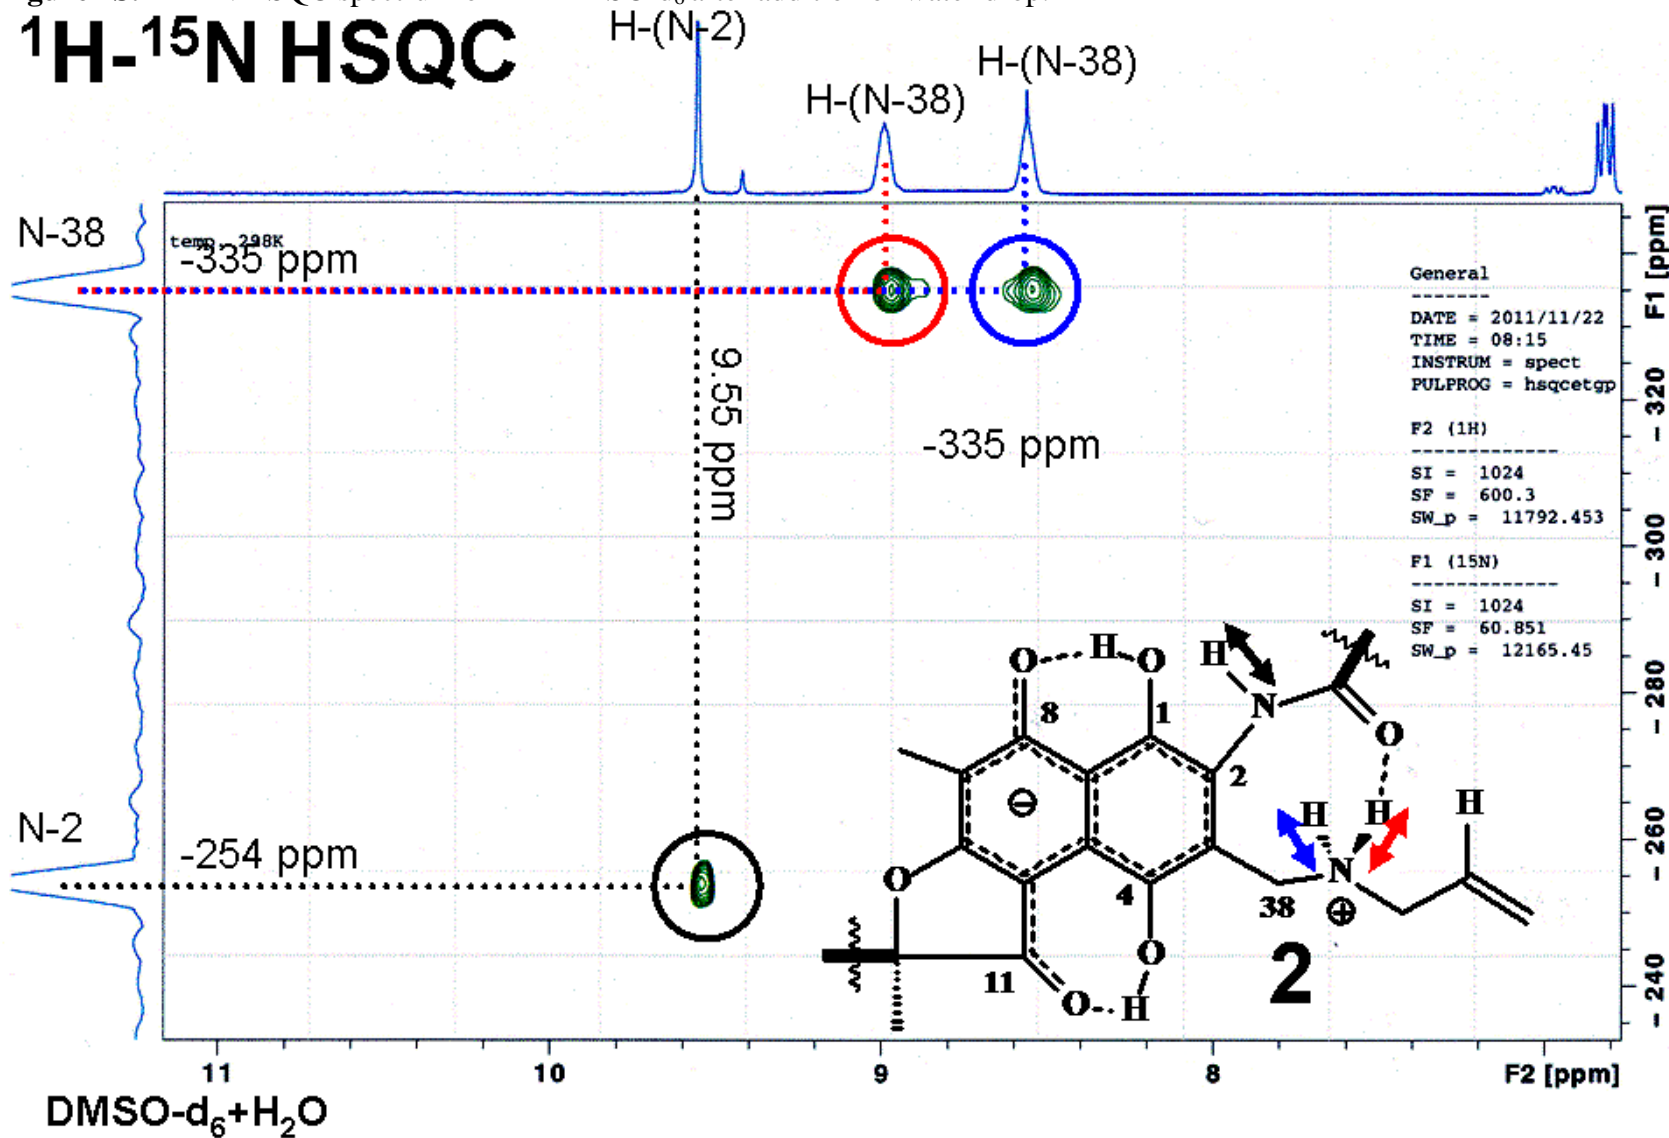

Figure S5.  $^1\text{H}$ - $^{13}\text{C}$  HMBC spectrum of **1** in DMSO- $d_6$  after addition of water drop.

$^1\text{H}$ - $^{13}\text{C}$  HMBC  
1-DMSO- $d_6$ +H $_2$ O

AAI00001E.051.001.2r.esp

|                        |                                                                         |                       |                                      |                        |
|------------------------|-------------------------------------------------------------------------|-----------------------|--------------------------------------|------------------------|
| Acquisition Time (sec) | (0.1769, 0.0065)                                                        | Comment               | 5 mm TBI 1H/13P-BB-D Z-GRD Z5740/001 |                        |
| Date                   | 23 Nov 2011 07:42:44                                                    |                       |                                      |                        |
| File Name              | E:\Doktorat\Publikacje\Chem comm\N15\NMR\1F-DMSO\AAI00001E\51\data\1\2r |                       |                                      |                        |
| Frequency (MHz)        | (600.31, 150.96)                                                        | Nucleus               | (1H, 13C)                            | Number of Transmits 48 |
| Origin                 | spect                                                                   | Original Points Count | (2048, 256)                          | Owner root             |
| Points Count           | (2048, 1024)                                                            | Pulse Sequence        | hmbcplpndqf                          | Solvent DMSO           |
| Spectrum Type          | HMBC                                                                    | Sweep Width (Hz)      | (11568.42, 39177.39)                 |                        |
| Temperature (degree C) | 25.000                                                                  | Title                 | HMBCGP                               |                        |

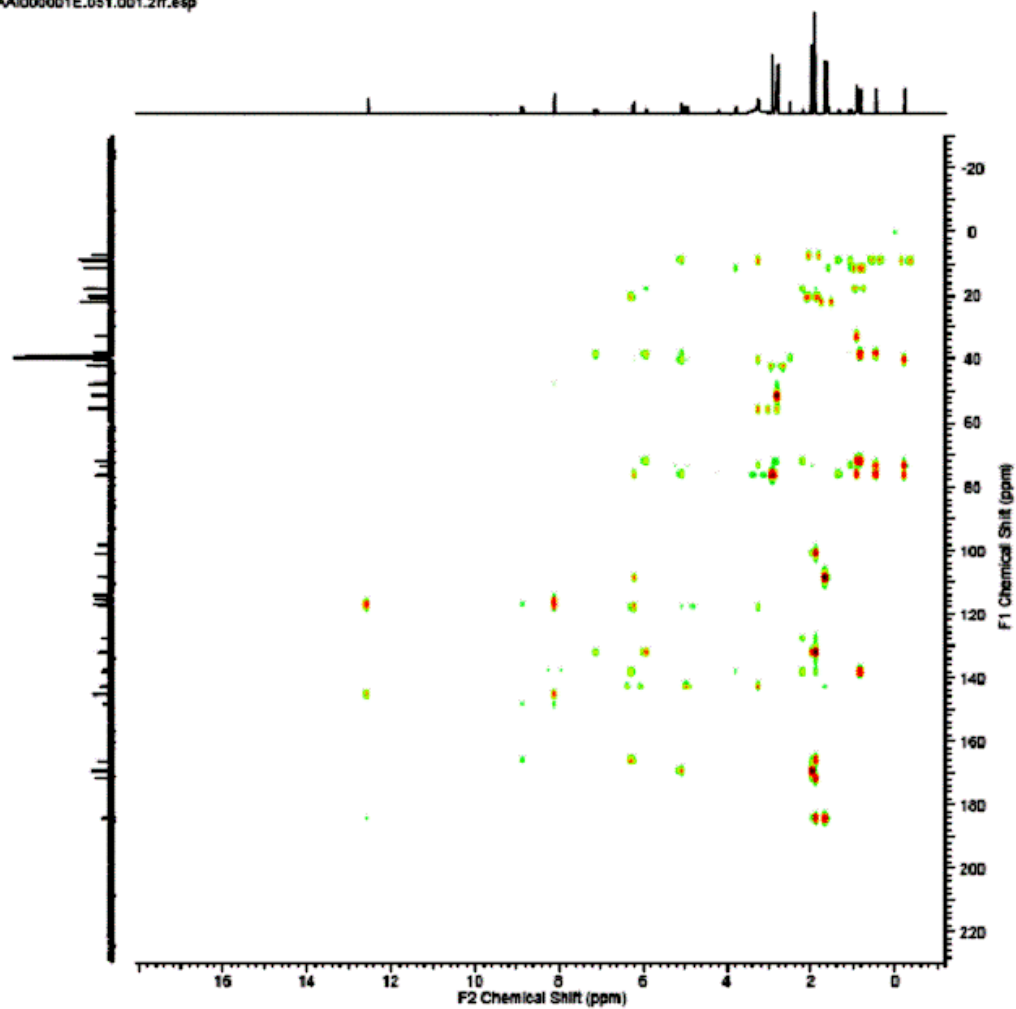



Figure 6S.  $^1\text{H}$ - $^{13}\text{C}$  HMBC spectrum of **1** in DMSO- $d_6$  after addition of water drop in the range  $^1\text{H}(1.4\text{-}2.2)$ - $^{13}\text{C}$  (164-188) ppm.

$^1\text{H}$ - $^{13}\text{C}$  HMBC  
**1**-DMSO- $d_6$ + $\text{H}_2\text{O}$

AAID00001E.051.001.2IT.asp

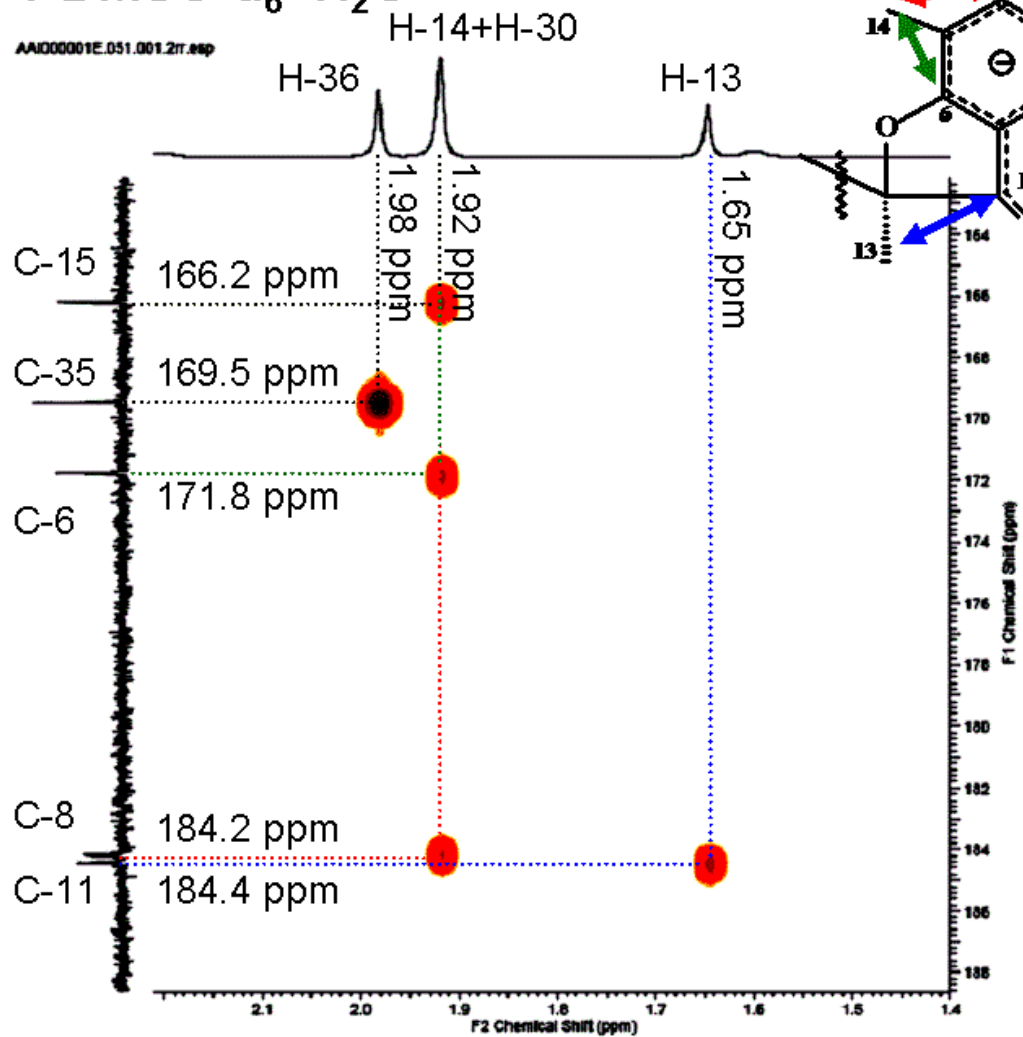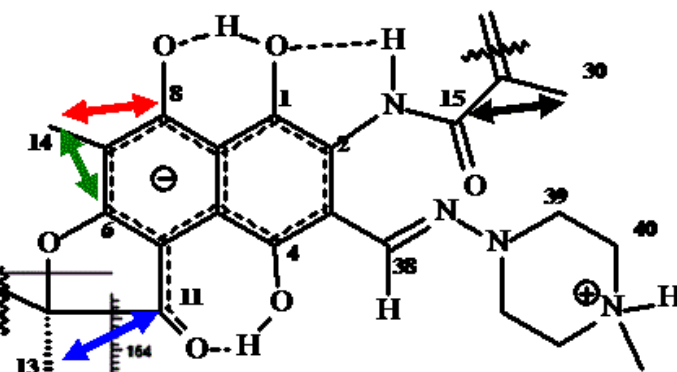

Figure 7S.  $^1\text{H}$ - $^{13}\text{C}$  HMBC spectrum of **1** in  $\text{CDCl}_3$ .

$^1\text{H}$ - $^{13}\text{C}$  HMBC  
1- $\text{CDCl}_3$

|                        |                                                                    |                       |                                     |
|------------------------|--------------------------------------------------------------------|-----------------------|-------------------------------------|
| Acquisition Time (sec) | (0.1835, 0.0141)                                                   | Comment               | 5 mm TBI 1H/31P-BB-D 2-GRD 25740001 |
| Date                   | 14 Feb 2011 09:33:28                                               |                       |                                     |
| File Name              | E:\Doktorat\Publikacje\Chem\comm\ze-stawienie\1H-13C\16\DATA\112RR |                       |                                     |
| Frequency (MHz)        | (500.30, 150.96)                                                   | Nucleus               | (1H, 13C)                           |
| Origin                 | spect                                                              | Original Points Count | (2048, 512)                         |
| Points Count           | (1024, 1024)                                                       | Pulse Sequence        | hmbcsg090dof                        |
| Spectrum Type          | HMBC                                                               | Sweep Width (Hz)      | (11149.81, 35196.50)                |
| Temperature (degree C) | 25.000                                                             | Time                  | HMBCGP.RU                           |

HMBC.esp

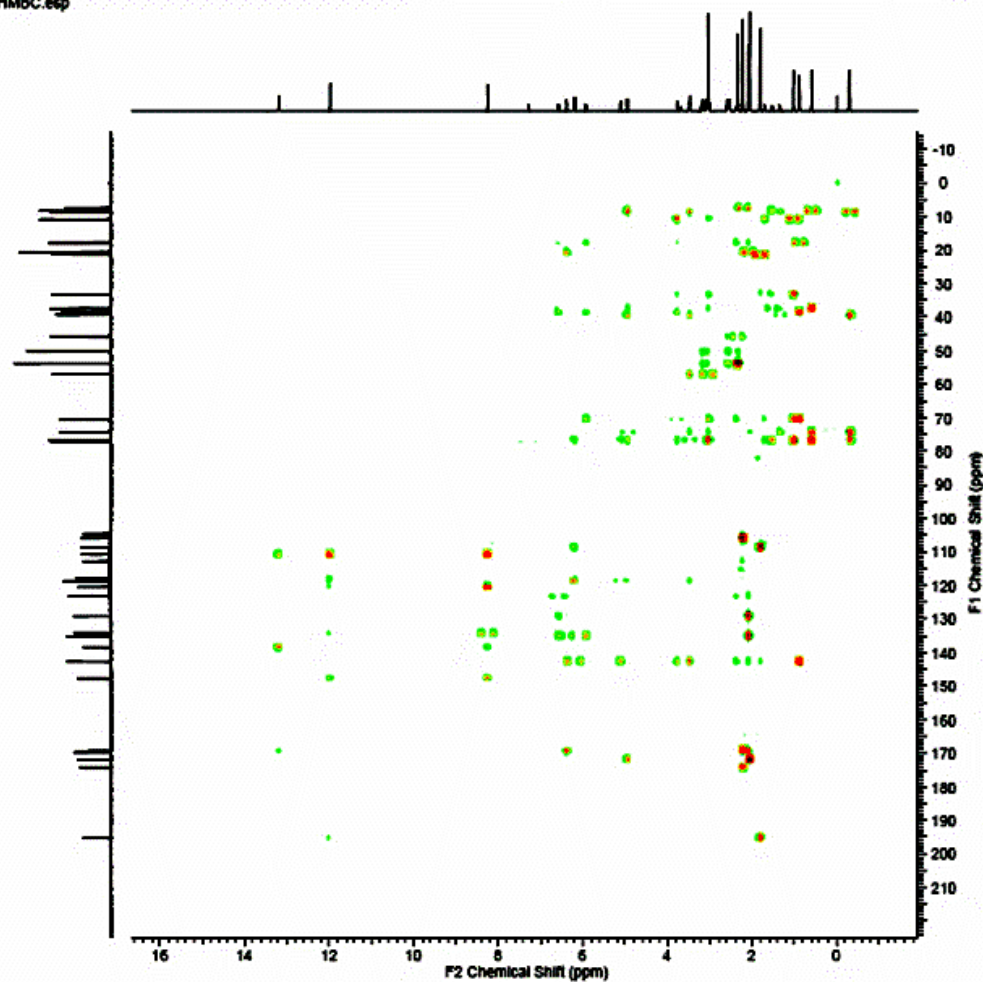

Figure S8.  $^1\text{H}$ - $^{13}\text{C}$  HMBC spectrum of **1** in  $\text{CDCl}_3$  in the range  $^1\text{H}(11.5\text{-}14.5)$ - $^{13}\text{C}$  (103-195) ppm.

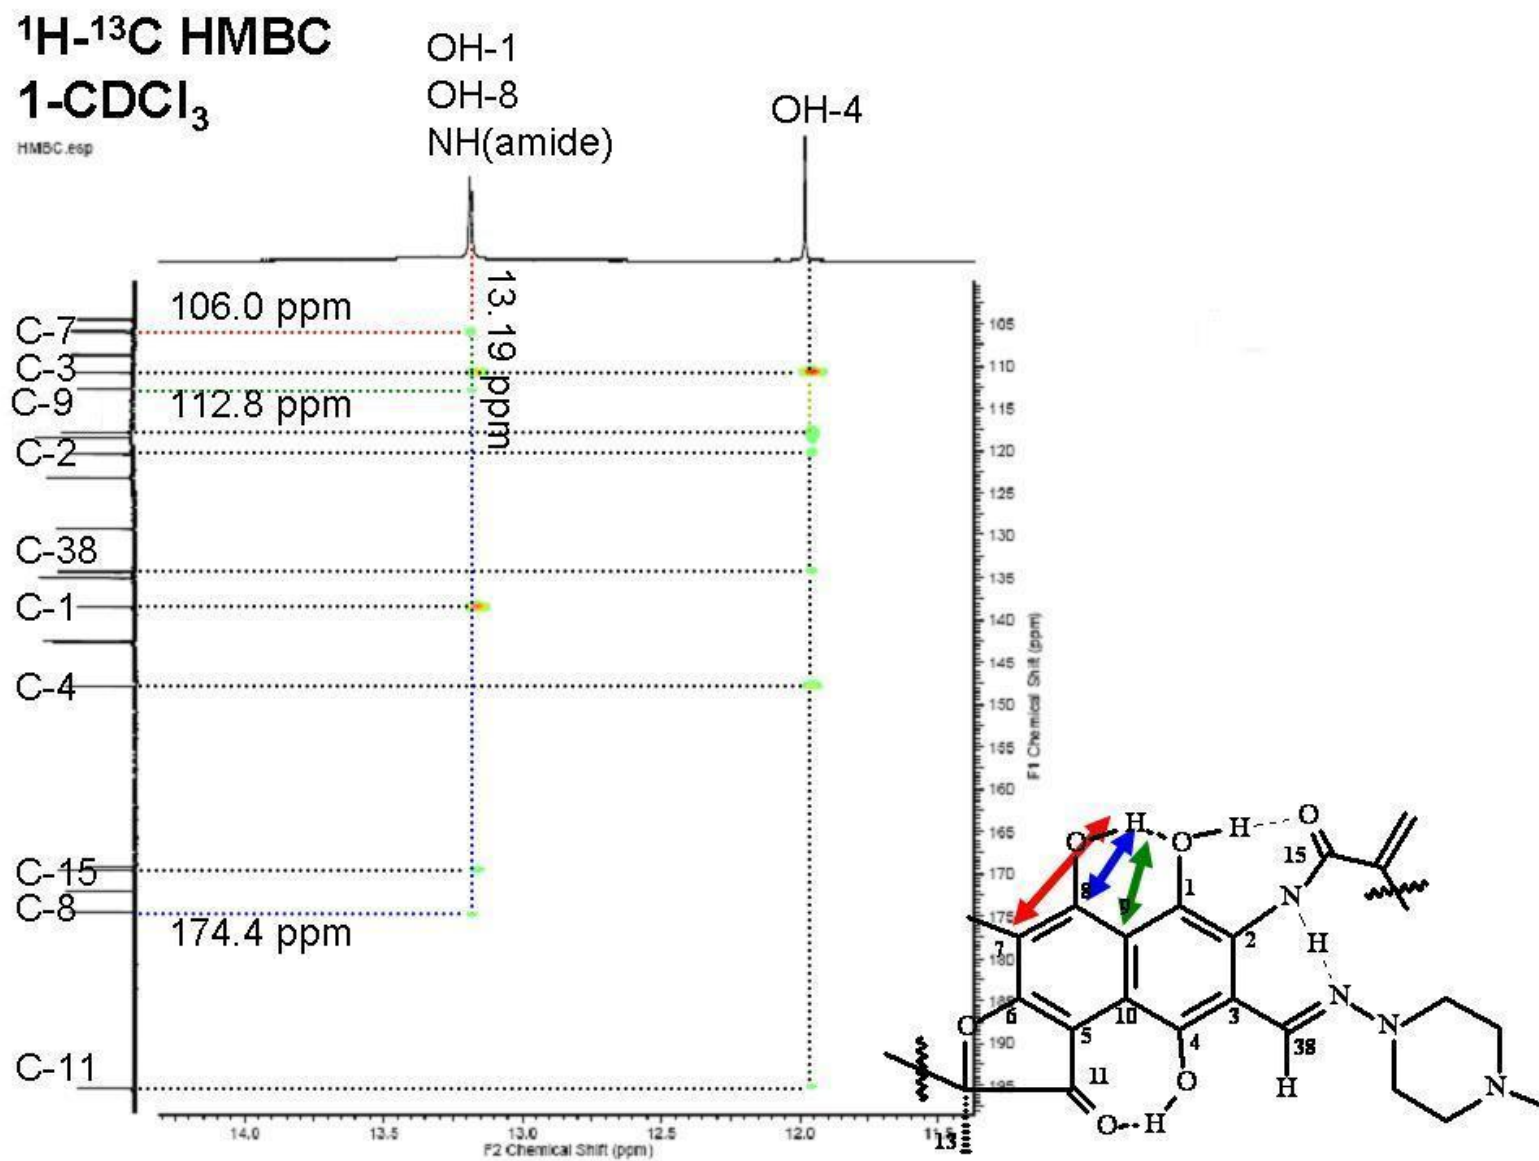

Figure 9S.  $^1\text{H}$ - $^{13}\text{C}$  HMBC spectrum of **1** in  $\text{CDCl}_3$  in the range  $^1\text{H}(1.5\text{-}2.4)\text{-}^{13}\text{C}$  (166-198) ppm.

## $^1\text{H}$ - $^{13}\text{C}$ HMBC

**1**- $\text{CDCl}_3$

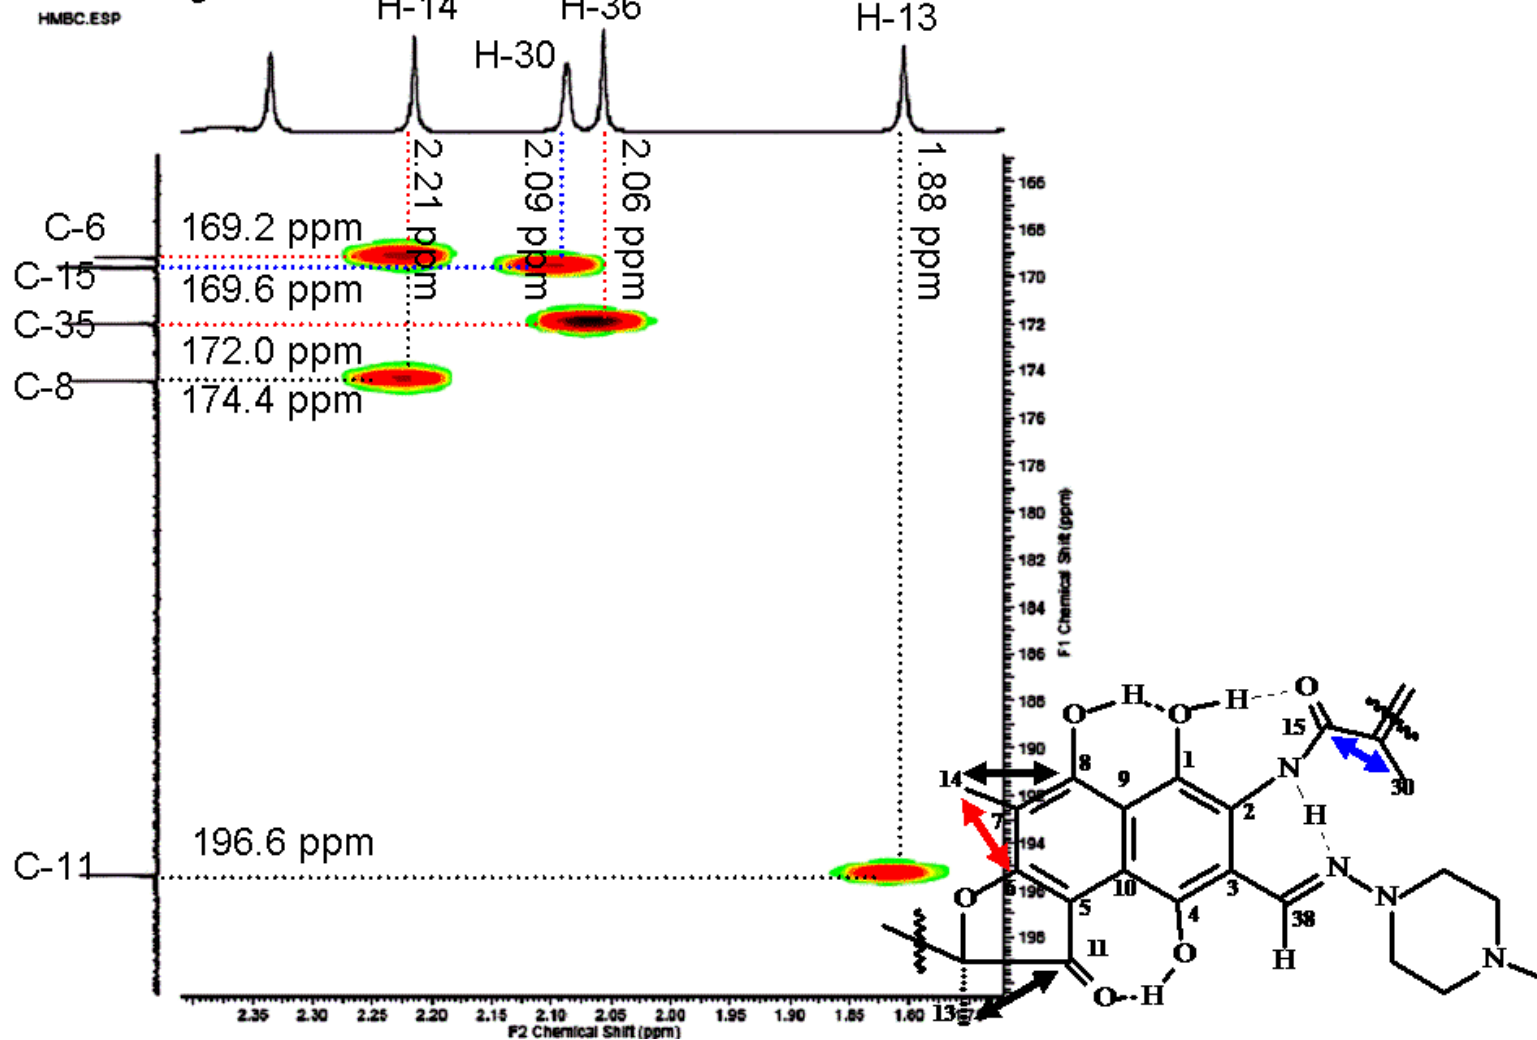

Figure 10S.  $^1\text{H}$ - $^{13}\text{C}$  HMBC spectrum of **5** in  $\text{CDCl}_3$ .

$^1\text{H}$ - $^{13}\text{C}$  HMBC  
**5**- $\text{CDCl}_3$

| Acquisition Time (sec) | (0.1720, 0.0065)                                  | Comment                | 8 mm TBI 1H/31P-BB-D 2-GRD Z5740/001 |
|------------------------|---------------------------------------------------|------------------------|--------------------------------------|
| Date                   | 17 Oct 2011 10:34:40                              |                        |                                      |
| File Name              | E:\Doktorat\RIN\NMR\5-1-korv\AUG0000114\data\112r | Frequency (MHz)        | (600.31, 150.96)                     |
| Nucleus                | ( $^1\text{H}$ , $^{13}\text{C}$ )                | Number of Transients   | 200                                  |
| Original Points Count  | (2048, 256)                                       | Owner                  | root                                 |
| Pulse Sequence         | hmbcgp1ndf                                        | Solvent                | $\text{CDCl}_3$                      |
| Sweep Width (Hz)       | (11698.95, 39331.63)                              | Spectrum Type          | HMBC                                 |
| Title                  | HMBCGP                                            | Temperature (degree C) | 24.600                               |

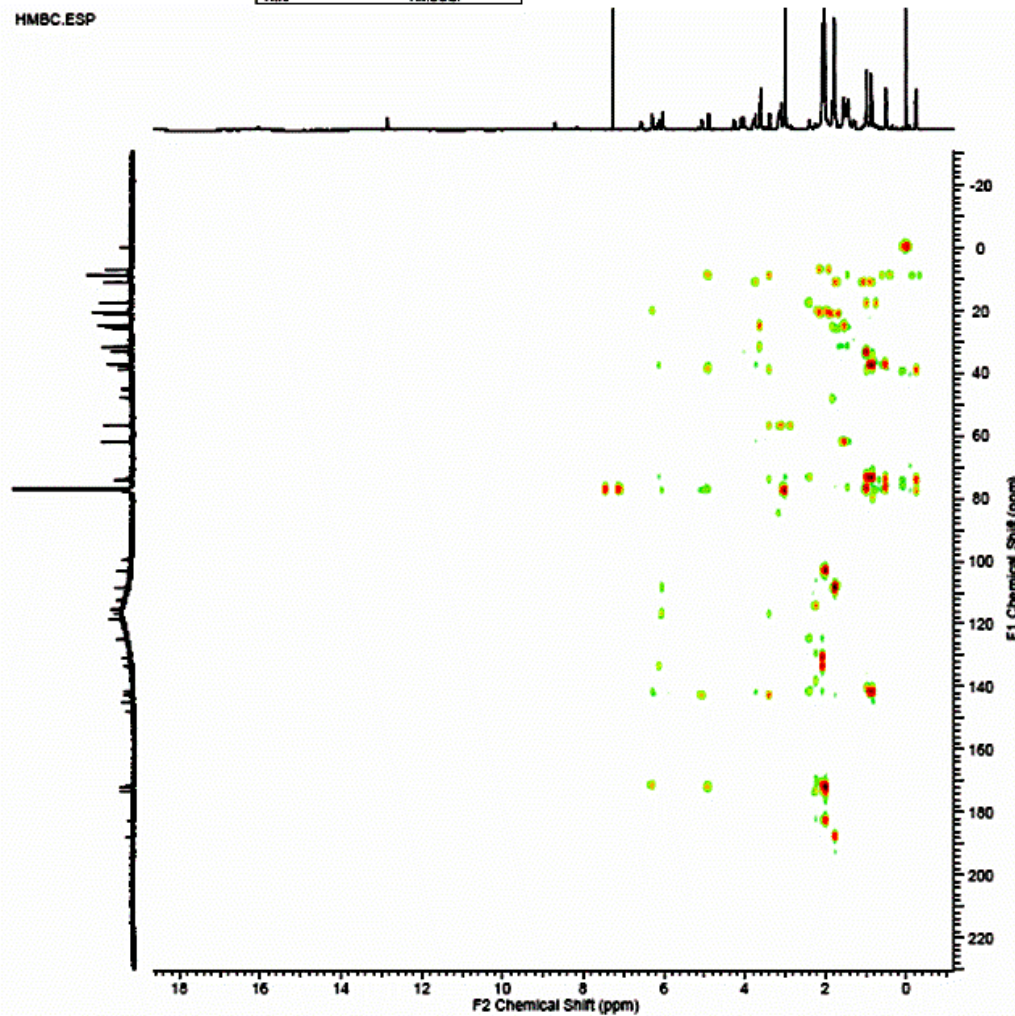

Figure 11S.  $^1\text{H}$ - $^{13}\text{C}$  HMBC spectrum of **5** in  $\text{CDCl}_3$  in the range  $^1\text{H}(1.75\text{-}2.2)\text{-}^{13}\text{C}(168\text{-}190)$  ppm.

### $^1\text{H}$ - $^{13}\text{C}$ HMBC

**5**- $\text{CDCl}_3$

HMBC.ESP

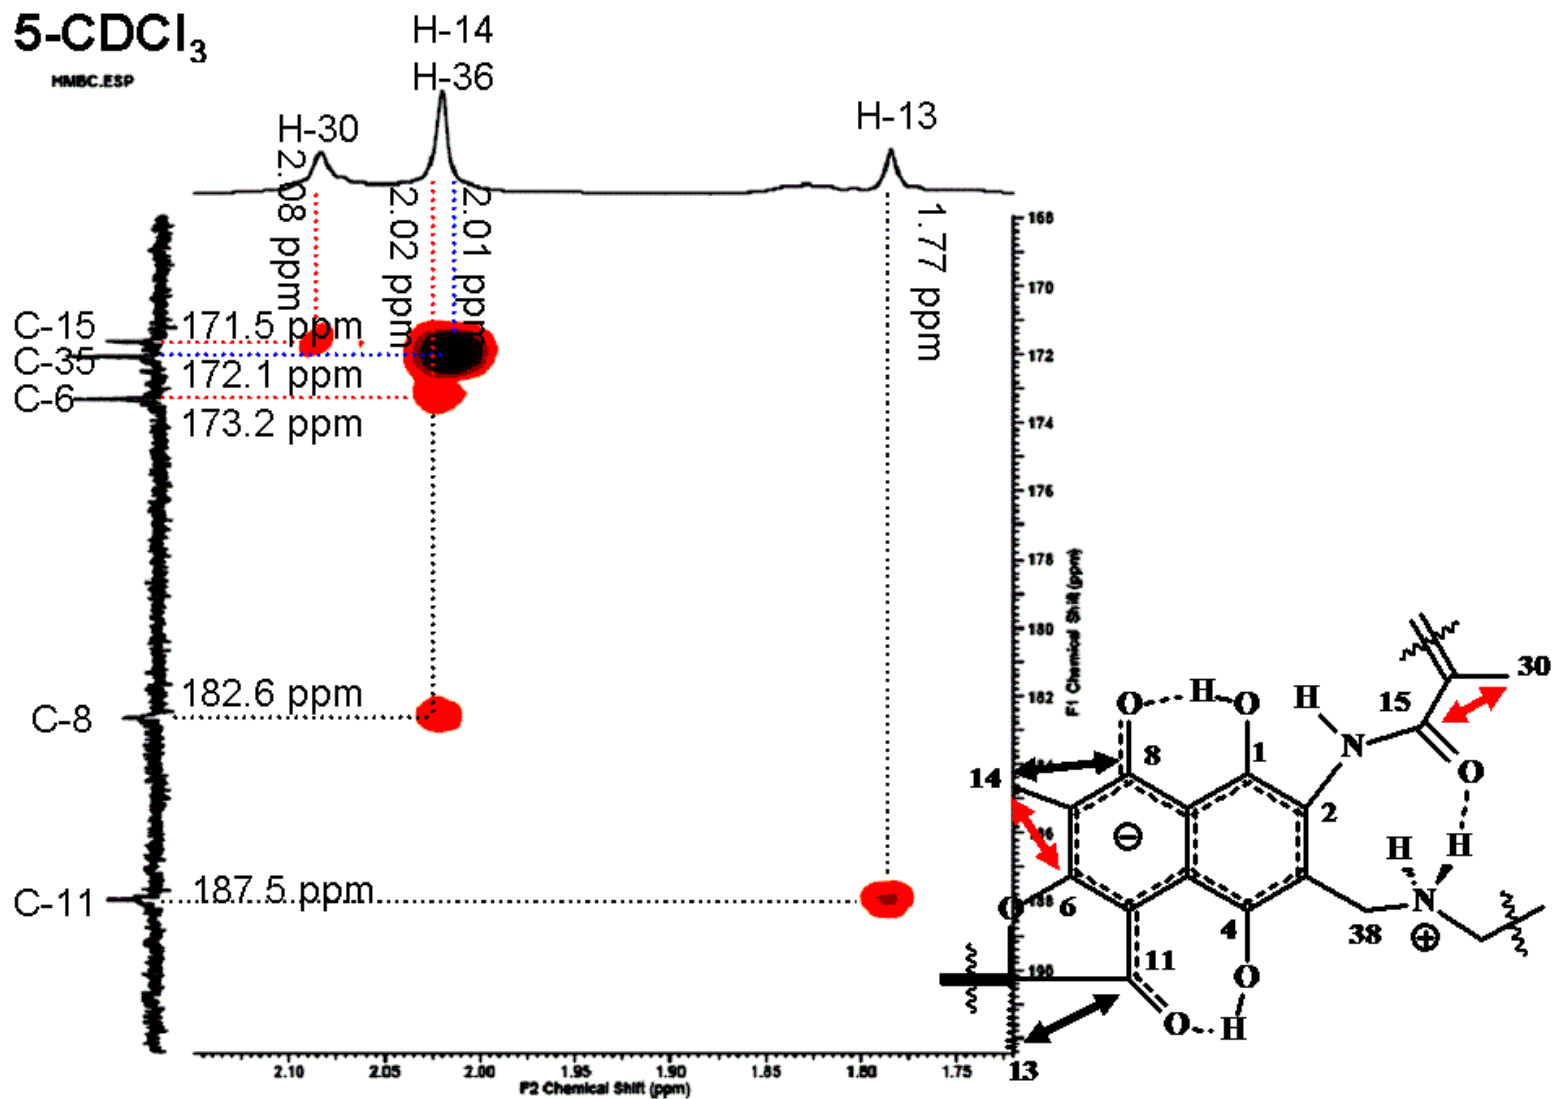

Supplement: c2ob00008c.pdf [file c2ob00008c.pdf]
